# Supplementary material
Source: publisher figshare collection journal article supplement (https://acs.figshare.com/ndownloader/files/30722195)
Supplement: Supplementary file 1 [file 30722195]

**Supporting Information for**  
**Global competition in the lithium-ion battery supply chain: A novel perspective**  
**for criticality analysis**

Xin Sun<sup>1,2</sup>, Zongwei Liu<sup>1,3</sup>, Fuquan Zhao<sup>1,3</sup>, Han Hao<sup>1,2,3\*</sup>

<sup>1</sup> State Key Laboratory of Automotive Safety and Energy, Tsinghua University,  
Beijing 100084, China

<sup>2</sup> Tsinghua-Rio Tinto Joint Research Center for Resources Energy and Sustainable  
Development, Tsinghua University, Beijing 100084, China

<sup>3</sup> Tsinghua Automotive Strategy Research Institute, Tsinghua University, Beijing  
100084, China

\* Lead contact: [hao@tsinghua.edu.cn](mailto:hao@tsinghua.edu.cn)

**Summary Information**

**Number of pages:** 37

**Tables:** S1-S21

**Figures:** S1-S2

## **Table of content**

|                                               |     |
|-----------------------------------------------|-----|
| 1. Underlying data and relevant sources.....  | S3  |
| 2. Model assumptions and data treatments..... | S18 |
| 3. Detail results.....                        | S24 |
| 4. Uncertainty analysis.....                  | S33 |
| References.....                               | S35 |

## 1. Underlying data and relevant sources

**Table S1 Domestic production and import of lithium minerals by country**

| <b>Lithium mineral/ton lithium metallic equivalent</b> |                            |               |
|--------------------------------------------------------|----------------------------|---------------|
| <b>Country</b>                                         | <b>Domestic production</b> | <b>Import</b> |
| Argentina                                              | 6,300                      | 0             |
| Australia                                              | 45,000                     | 0             |
| Brazil                                                 | 2,400                      | 0             |
| Canada                                                 | 200                        | 0             |
| Chile                                                  | 19,300                     | 0             |
| China                                                  | 10,800                     | 48,023        |
| Portugal                                               | 900                        | 0             |
| USA                                                    | 1,380                      | 295           |

The production data is extracted from USGS's report<sup>1</sup>. The import data is extracted from the report of China nonferrous metals industry association<sup>2</sup>.

**Table S2 Domestic production and import of cobalt ores by country**

| <b>Cobalt ore/ton cobalt metallic equivalent</b> |                            |               |
|--------------------------------------------------|----------------------------|---------------|
| <b>Country</b>                                   | <b>Domestic production</b> | <b>Import</b> |
| Australia                                        | 5,740                      | 0             |
| Belgium                                          | 0                          | 6,600         |
| Botswana                                         | 400                        | 0             |
| Brazil                                           | 1,200                      | 49            |
| Canada                                           | 3,340                      | 3,160         |
| China                                            | 2,500                      | 75,860        |
| Cuba                                             | 3,800                      | 0             |
| Czechia                                          | 0                          | 14            |
| Democratic Republic of the Congo                 | 100,000                    | 0             |
| El Salvador                                      | 0                          | 3             |
| Finland                                          | 440                        | 12,360        |
| France                                           | 0                          | 3             |
| Germany                                          | 0                          | 14            |
| India                                            | 0                          | 100           |
| Indonesia                                        | 400                        | 2             |
| Ireland                                          | 0                          | 27            |
| Israel                                           | 0                          | 4             |
| Italy                                            | 0                          | 13            |

|                  |       |       |
|------------------|-------|-------|
| Japan            | 0     | 4,000 |
| Madagascar       | 3,400 | 0     |
| Malaysia         | 0     | 1,293 |
| Morocco          | 2,300 | 1,245 |
| New Caledonia    | 1,600 | 0     |
| Norway           | 0     | 3,500 |
| Papua New Guinea | 2,910 | 0     |
| Philippines      | 5,100 | 23    |
| Qatar            | 0     | 7     |
| Rep. of Korea    | 0     | 1,725 |
| Singapore        | 0     | 1     |
| South Africa     | 2,100 | 40    |
| Spain            | 0     | 1,429 |
| Switzerland      | 0     | 1     |
| Thailand         | 0     | 5     |
| Turkey           | 0     | 27    |
| United Kingdom   | 0     | 94    |
| USA              | 500   | 174   |
| Viet Nam         | 0     | 82    |
| Zambia           | 1,000 | 1,000 |
| Zimbabwe         | 800   | 0     |

The production data is extracted from USGS's report<sup>1</sup>. The import data is extracted from UN Comtrade database<sup>3</sup>. HS code of relevant commodity is 260500. Estimation of cobalt content in relevant commodity is adopted from our previous studies<sup>4</sup>.

**Table S3 Domestic production and import of nickel ores by country**

| <b>Nickel ore/ton nickel metallic equivalent</b> |                            |               |
|--------------------------------------------------|----------------------------|---------------|
| <b>Country</b>                                   | <b>Domestic production</b> | <b>Import</b> |
| Albania                                          | 5,520                      | 0             |
| Australia                                        | 159,000                    | 0             |
| Austria                                          | 0                          | 1             |
| Belgium                                          | 0                          | 31            |
| Botswana                                         | 15,195                     | 0             |
| Brazil                                           | 60,600                     | 7             |
| Canada                                           | 181,000                    | 0             |
| China                                            | 120,000                    | 841,743       |
| Colombia                                         | 36,564                     | 0             |
| Cuba                                             | 49,200                     | 0             |

|                        |         |        |
|------------------------|---------|--------|
| Cyprus                 | 0       | 35     |
| Finland                | 8,779   | 0      |
| France                 | 0       | 2      |
| Germany                | 0       | 61     |
| Greece                 | 17,748  | 898    |
| Guatemala              | 47,425  | 0      |
| Indonesia              | 853,000 | 2,538  |
| Italy                  | 0       | 1      |
| Japan                  | 0       | 57,660 |
| Lao People's Dem. Rep. | 0       | 19     |
| Madagascar             | 41,700  | 0      |
| Malaysia               | 0       | 6      |
| Morocco                | 250     | 0      |
| New Caledonia          | 208,000 | 0      |
| Norway                 | 350     | 0      |
| Papua New Guinea       | 25,582  | 0      |
| Philippines            | 323,000 | 0      |
| Rep. of Korea          | 0       | 47,386 |
| Serbia                 | 7,418   | 0      |
| Singapore              | 0       | 9      |
| South Africa           | 33,400  | 1      |
| Spain                  | 7,213   | 0      |
| Thailand               | 0       | 1      |
| Turkey                 | 9,600   | 0      |
| USA                    | 13,500  | 1      |
| Venezuela              | 3,700   | 0      |
| Viet Nam               | 0       | 1      |
| Zimbabwe               | 14,579  | 0      |

The production data is extracted from USGS's report<sup>1</sup>. The import data is extracted from UN Comtrade database<sup>3</sup>. HS code of relevant commodity is 260400. Estimation of nickel content in relevant commodity is adopted from previous literatures<sup>5</sup>.

**Table S4 Domestic production and import of manganese ores by country**

| Manganese ore/kiloton manganese metallic equivalent |                     |        |         |                     |        |
|-----------------------------------------------------|---------------------|--------|---------|---------------------|--------|
| Country                                             | Domestic production | Import | Country | Domestic production | Import |
| Argentina                                           | 0                   | 6      | Mexico  | 202                 | 57     |
| Australia                                           | 3,180               | 21     | Namibia | 0                   | 15     |

|            |       |        |                    |       |     |
|------------|-------|--------|--------------------|-------|-----|
| Belgium    | 0     | 24     | Netherlands        | 0     | 8   |
| Brazil     | 1,740 | 27     | Norway             | 0     | 550 |
| China      | 1,300 | 11,832 | Poland             | 0     | 53  |
| Colombia   | 0     | 11     | Rep. of Korea      | 0     | 455 |
| Czechia    | 0     | 12     | Russian Federation | 0     | 488 |
| France     | 0     | 217    | Saudi Arabia       | 0     | 85  |
| Gabon      | 2,510 | 0      | Serbia             | 0     | 9   |
| Georgia    | 116   | 41     | Singapore          | 0     | 5   |
| Germany    | 0     | 9      | Slovakia           | 0     | 18  |
| Ghana      | 1,550 | 0      | South Africa       | 5,800 | 11  |
| Greece     | 0     | 18     | Spain              | 0     | 134 |
| Guatemala  | 0     | 1      | Thailand           | 0     | 19  |
| Hungary    | 0     | 10     | Turkey             | 0     | 1   |
| India      | 801   | 1,292  | Ukraine            | 500   | 0   |
| Indonesia  | 0     | 161    | United Kingdom     | 0     | 2   |
| Italy      | 0     | 2      | USA                | 0     | 196 |
| Japan      | 0     | 469    | Uzbekistan         | 0     | 7   |
| Kazakhstan | 140   | 0      | Viet Nam           | 0     | 37  |
| Malaysia   | 390   | 544    |                    |       |     |

The production data is extracted from USGS's report<sup>1</sup>. The import data is extracted from UN Comtrade database<sup>3</sup>. HS code of relevant commodity is 260200. Estimation of cobalt content in relevant commodity is adopted from our previous studies<sup>6</sup>.

**Table S5 Domestic production and import of natural graphite by country**

| Natural graphite/ton |                     |        |             |                     |        |
|----------------------|---------------------|--------|-------------|---------------------|--------|
| Country              | Domestic production | Import | Country     | Domestic production | Import |
| Argentina            | 0                   | 1,109  | Luxembourg  | 0                   | 2      |
| Armenia              | 0                   | 6      | Madagascar  | 48,000              | 940    |
| Australia            | 0                   | 437    | Malawi      | 0                   | 6      |
| Austria              | 1,000               | 16,837 | Malaysia    | 0                   | 27,506 |
| Azerbaijan           | 0                   | 54     | Mauritania  | 0                   | 90     |
| Belarus              | 0                   | 597    | Mauritius   | 0                   | 9      |
| Belgium              | 0                   | 9,077  | Mongolia    | 0                   | 117    |
| Belize               | 0                   | 1      | Morocco     | 0                   | 56     |
| Bermuda              | 0                   | 59     | Myanmar     | 0                   | 1,263  |
| Bosnia Herzegovina   | 0                   | 4      | Netherlands | 0                   | 11,955 |

|                        |         |         |                      |        |        |
|------------------------|---------|---------|----------------------|--------|--------|
| Botswana               | 0       | 51      | New Zealand          | 0      | 18     |
| Bulgaria               | 0       | 18      | Nigeria              | 0      | 82     |
| Burkina Faso           | 0       | 1       | Norway               | 16,000 | 49     |
| Burundi                | 0       | 207     | Pakistan             | 14,000 | 3,952  |
| Cambodia               | 0       | 5       | Paraguay             | 0      | 208    |
| Chile                  | 0       | 118     | Philippines          | 0      | 1,354  |
| China                  | 700,000 | 196,991 | Poland               | 0      | 11,884 |
| Colombia               | 0       | 756     | Portugal             | 0      | 16     |
| Congo                  | 0       | 189     | Qatar                | 0      | 135    |
| Costa Rica             | 0       | 2       | Rep. of Moldova      | 0      | 5      |
| Croatia                | 0       | 27      | Romania              | 0      | 230    |
| Czechia                | 0       | 5,647   | Russian Federation   | 0      | 3,825  |
| Denmark                | 0       | 223     | Rwanda               | 0      | 4      |
| Ecuador                | 0       | 67      | Saudi Arabia         | 0      | 127    |
| Egypt                  | 0       | 309     | Senegal              | 0      | 28     |
| El Salvador            | 0       | 1       | Serbia               | 0      | 92     |
| Estonia                | 0       | 3       | Singapore            | 0      | 274    |
| Finland                | 0       | 257     | Slovenia             | 0      | 209    |
| France                 | 0       | 8,148   | South Africa         | 0      | 769    |
| Germany                | 800     | 48,608  | Spain                | 0      | 6,229  |
| Guatemala              | 0       | 221     | State of Palestine   | 0      | 9      |
| Guyana                 | 0       | 137     | Sweden               | 0      | 1,564  |
| Iceland                | 0       | 25      | Switzerland          | 0      | 548    |
| India                  | 35,000  | 45,003  | Tunisia              | 0      | 14     |
| Indonesia              | 0       | 2,124   | Turkey               | 2,000  | 10,584 |
| Ireland                | 0       | 21      | United Arab Emirates | 0      | 197    |
| Italy                  | 0       | 5,909   | United Kingdom       | 0      | 5,925  |
| Japan                  | 0       | 58,996  | Uruguay              | 0      | 236    |
| Kazakhstan             | 0       | 247     | USA                  | 0      | 50,209 |
| Kenya                  | 0       | 2       | Uzbekistan           | 100    | 155    |
| Kuwait                 | 0       | 239     | Viet Nam             | 0      | 1,443  |
| Kyrgyzstan             | 0       | 143     | Yemen                | 0      | 19     |
| Lao People's Dem. Rep. | 0       | 6       | Zambia               | 0      | 46     |
| Latvia                 | 0       | 10      |                      |        |        |

The production data is extracted from USGS's report<sup>1</sup>. The import data is extracted from UN Comtrade database<sup>3</sup>. HS code of relevant commodities are 250410 and

250490<sup>7</sup>. The natural graphite content in relevant commodities is assumed to be 100%.

**Table S6 Domestic production and import of lithium carbonates by country**

| <b>Lithium carbonate/ton</b> |                            |               |                      |                            |               |
|------------------------------|----------------------------|---------------|----------------------|----------------------------|---------------|
| <b>Country</b>               | <b>Domestic production</b> | <b>Import</b> | <b>Country</b>       | <b>Domestic production</b> | <b>Import</b> |
| Argentina                    | 34,904                     | 87            | Kazakhstan           | 0                          | 1             |
| Australia                    | 0                          | 164           | Latvia               | 0                          | 1             |
| Austria                      | 0                          | 259           | Lithuania            | 0                          | 1             |
| Belarus                      | 0                          | 2             | Malaysia             | 0                          | 59            |
| Belgium                      | 0                          | 6,874         | Mauritius            | 0                          | 1             |
| Belize                       | 0                          | 1             | Netherlands          | 0                          | 6,855         |
| Bulgaria                     | 0                          | 1             | New Zealand          | 0                          | 2             |
| Canada                       | 0                          | 1,978         | Nigeria              | 0                          | 7             |
| Chile                        | 102,692                    | 12            | Norway               | 0                          | 43            |
| China                        | 154,000                    | 29,316        | Pakistan             | 0                          | 49            |
| Colombia                     | 0                          | 9             | Peru                 | 0                          | 2             |
| Costa Rica                   | 0                          | 4             | Philippines          | 0                          | 2             |
| Croatia                      | 0                          | 6             | Poland               | 0                          | 137           |
| Czechia                      | 0                          | 84            | Portugal             | 0                          | 33            |
| Denmark                      | 0                          | 79            | Rep. of Korea        | 0                          | 38,578        |
| Ecuador                      | 0                          | 1             | Romania              | 0                          | 8             |
| Egypt                        | 0                          | 10            | Russian Federation   | 0                          | 7,414         |
| Estonia                      | 0                          | 1             | Saudi Arabia         | 0                          | 5             |
| Finland                      | 0                          | 52            | Serbia               | 0                          | 1             |
| France                       | 0                          | 1,694         | Singapore            | 0                          | 33            |
| Germany                      | 0                          | 2,270         | Slovakia             | 0                          | 20            |
| Greece                       | 0                          | 43            | Slovenia             | 0                          | 54            |
| Honduras                     | 0                          | 1             | South Africa         | 0                          | 72            |
| Hungary                      | 0                          | 79            | Spain                | 0                          | 1,288         |
| Iceland                      | 0                          | 4             | Sweden               | 0                          | 193           |
| India                        | 0                          | 1,298         | Switzerland          | 0                          | 80            |
| Indonesia                    | 0                          | 11            | Thailand             | 0                          | 90            |
| Ireland                      | 0                          | 1             | United Arab Emirates | 0                          | 26            |
| Israel                       | 0                          | 1             | United Kingdom       | 0                          | 1,667         |
| Italy                        | 0                          | 579           | Uruguay              | 0                          | 1             |



|        |   |        |          |   |        |
|--------|---|--------|----------|---|--------|
| Japan  | 0 | 23,571 | USA      | 0 | 12,707 |
| Jordan | 0 | 2      | Viet Nam | 0 | 321    |

The production data is extracted from USGS's and China nonferrous metals industry association's report<sup>1, 2</sup>. The import data is extracted from UN Comtrade database<sup>3</sup>. HS code of relevant commodities is 283691. Estimation of lithium carbonate content in relevant commodity is assumed to be 100%.

**Table S7 Domestic production and import of lithium hydroxides by country**

| <b>Lithium hydroxide/ton</b> |                            |               |                    |                            |               |
|------------------------------|----------------------------|---------------|--------------------|----------------------------|---------------|
| <b>Country</b>               | <b>Domestic production</b> | <b>Import</b> | <b>Country</b>     | <b>Domestic production</b> | <b>Import</b> |
| Argentina                    | 0                          | 291           | Mexico             | 0                          | 18            |
| Australia                    | 0                          | 139           | Morocco            | 0                          | 30            |
| Austria                      | 0                          | 26            | Myanmar            | 0                          | 1             |
| Azerbaijan                   | 0                          | 4             | Netherlands        | 0                          | 1,463         |
| Belarus                      | 0                          | 26            | New Zealand        | 0                          | 2             |
| Belgium                      | 0                          | 1,763         | Nigeria            | 0                          | 2             |
| Bulgaria                     | 0                          | 8             | Pakistan           | 0                          | 61            |
| Canada                       | 0                          | 1,824         | Peru               | 0                          | 48            |
| Chile                        | 9,120                      | 20            | Philippines        | 0                          | 54            |
| China                        | 76,000                     | 545           | Poland             | 0                          | 206           |
| Colombia                     | 0                          | 33            | Portugal           | 0                          | 11            |
| Croatia                      | 0                          | 6             | Qatar              | 0                          | 7             |
| Czechia                      | 0                          | 147           | Rep. of Korea      | 0                          | 23,469        |
| Denmark                      | 0                          | 5             | Romania            | 0                          | 35            |
| Ecuador                      | 0                          | 4             | Russian Federation | 0                          | 238           |
| Egypt                        | 0                          | 118           | Saudi Arabia       | 0                          | 182           |
| Estonia                      | 0                          | 200           | Serbia             | 0                          | 8             |
| Finland                      | 0                          | 13            | Singapore          | 0                          | 313           |
| France                       | 0                          | 6,927         | Slovenia           | 0                          | 244           |
| Ghana                        | 0                          | 840           | South Africa       | 0                          | 428           |
| Greece                       | 0                          | 27            | Spain              | 0                          | 2,444         |
| Hungary                      | 0                          | 20            | Sweden             | 0                          | 202           |
| India                        | 0                          | 1,928         | Switzerland        | 0                          | 76            |
| Indonesia                    | 0                          | 126           | Thailand           | 0                          | 297           |
| Ireland                      | 0                          | 7             | Tunisia            | 0                          | 21            |

|            |   |        |                      |        |       |
|------------|---|--------|----------------------|--------|-------|
| Israel     | 0 | 18     | Turkey               | 0      | 300   |
| Italy      | 0 | 282    | United Arab Emirates | 0      | 550   |
| Japan      | 0 | 37,339 | United Kingdom       | 0      | 559   |
| Kazakhstan | 0 | 6      | USA                  | 13,173 | 1,252 |
| Kenya      | 0 | 2      | Uzbekistan           | 0      | 17    |
| Kuwait     | 0 | 7      | Viet Nam             | 0      | 25    |
| Malaysia   | 0 | 12     | Zambia               | 0      | 1     |

The production data is extracted from USGS's and China nonferrous metals industry association's report<sup>1,2</sup>. The import data is extracted from UN Comtrade database<sup>3</sup>. HS code of relevant commodities is 282520. Estimation of lithium hydroxide content in relevant commodity is assumed to be 100%.

**Table S8 Domestic production and import of refined cobalt by country**

| Refined cobalt/ton cobalt metallic equivalent |                     |        |                    |                     |        |
|-----------------------------------------------|---------------------|--------|--------------------|---------------------|--------|
| Country                                       | Domestic production | Import | Country            | Domestic production | Import |
| Argentina                                     | 0                   | 7      | Malaysia           | 0                   | 1,752  |
| Australia                                     | 3,200               | 31     | Mexico             | 0                   | 76     |
| Austria                                       | 0                   | 51     | Morocco            | 1,600               | 0      |
| Belarus                                       | 0                   | 1      | Netherlands        | 0                   | 189    |
| Belgium                                       | 6,600               | 757    | New Zealand        | 0                   | 1      |
| Brazil                                        | 0                   | 330    | Nigeria            | 0                   | 5      |
| Canada                                        | 6,500               | 2      | Norway             | 3,500               | 78     |
| Chile                                         | 0                   | 1      | Pakistan           | 0                   | 31     |
| China                                         | 78,360              | 23,013 | Philippines        | 0                   | 3      |
| Colombia                                      | 0                   | 3      | Poland             | 0                   | 6      |
| Costa Rica                                    | 0                   | 5      | Portugal           | 0                   | 4      |
| Croatia                                       | 0                   | 1      | Rep. of Korea      | 0                   | 1,465  |
| Czechia                                       | 0                   | 13     | Romania            | 0                   | 2      |
| Democratic Republic of the Congo              | 400                 | 0      | Russian Federation | 0                   | 13     |
| Egypt                                         | 0                   | 2      | Saudi Arabia       | 0                   | 38     |
| Finland                                       | 12,800              | 15     | Singapore          | 0                   | 332    |
| France                                        | 0                   | 255    | Slovakia           | 0                   | 4      |
| Germany                                       | 0                   | 393    | Slovenia           | 0                   | 11     |

|                        |       |     |                      |       |       |
|------------------------|-------|-----|----------------------|-------|-------|
| Ghana                  | 0     | 1   | South Africa         | 1,000 | 13    |
| Greece                 | 0     | 2   | Spain                | 0     | 194   |
| Hungary                | 0     | 74  | Sweden               | 0     | 30    |
| India                  | 100   | 118 | Switzerland          | 0     | 25    |
| Indonesia              | 0     | 53  | Thailand             | 0     | 31    |
| Ireland                | 0     | 72  | Tunisia              | 0     | 15    |
| Israel                 | 0     | 6   | Turkey               | 0     | 50    |
| Italy                  | 0     | 78  | United Arab Emirates | 0     | 9     |
| Japan                  | 4,000 | 774 | United Kingdom       | 0     | 425   |
| Lao People's Dem. Rep. | 0     | 1   | USA                  | 0     | 1,241 |
| Lithuania              | 0     | 8   | Uzbekistan           | 0     | 1     |
| Luxembourg             | 0     | 5   | Viet Nam             | 0     | 9     |
| Madagascar             | 2,800 | 0   | Zambia               | 2,000 | 597   |

The production data is extracted from Cobalt Institute's report<sup>8</sup>. The import data is extracted from UN Comtrade database<sup>3</sup>. HS codes of relevant commodities are 282200, 282734, 810520, 810530 and 810590. Estimation of cobalt content in relevant commodities is adopted from our previous studies<sup>4</sup>.

**Table S9 Domestic production and import of nickel chemicals by country**

| Nickel chemicals/kilo ton |                     |        |
|---------------------------|---------------------|--------|
| Country                   | Domestic production | Import |
| Australia                 | 0                   | 2      |
| Belgium                   | 0                   | 4      |
| Canada                    | 0                   | 3      |
| China                     | 167                 | 1      |
| Finland                   | 8                   | 0      |
| France                    | 1                   | 0      |
| Germany                   | 0                   | 1      |
| Italy                     | 0                   | 1      |
| Japan                     | 17                  | 22     |
| Malaysia                  | 0                   | 1      |
| Norway                    | 8                   | 0      |
| Philippines               | 0                   | 1      |

|                |    |   |
|----------------|----|---|
| Rep. of Korea  | 12 | 3 |
| South Africa   | 6  | 0 |
| Thailand       | 0  | 1 |
| United Kingdom | 8  | 2 |

The production data is extracted from China bulk commodity metal database<sup>9</sup>. The import data is extracted from UN Comtrade database<sup>3</sup>. HS codes of relevant commodity is 283324. Estimation of nickel content in relevant commodities is adopted from previous literatures<sup>5</sup>.

**Table S10 Domestic production and import of electrolytic manganese dioxides by country**

| <b>Electrolytic manganese dioxide/ton</b> |                            |               |                |                            |               |
|-------------------------------------------|----------------------------|---------------|----------------|----------------------------|---------------|
| <b>Country</b>                            | <b>Domestic production</b> | <b>Import</b> | <b>Country</b> | <b>Domestic production</b> | <b>Import</b> |
| Argentina                                 | 0                          | 9             | Madagascar     | 0                          | 1             |
| Australia                                 | 0                          | 11,216        | Malawi         | 0                          | 1             |
| Austria                                   | 0                          | 150           | Malaysia       | 0                          | 4,074         |
| Belarus                                   | 0                          | 13            | Mexico         | 0                          | 1,039         |
| Belgium                                   | 0                          | 18,929        | Morocco        | 0                          | 165           |
| Bosnia Herzegovina                        | 0                          | 1             | Myanmar        | 0                          | 597           |
| Brazil                                    | 0                          | 1,724         | Namibia        | 0                          | 4,552         |
| Cambodia                                  | 0                          | 2             | Netherlands    | 0                          | 102           |
| Canada                                    | 0                          | 3,399         | New Zealand    | 0                          | 41            |
| Chile                                     | 0                          | 26            | Nigeria        | 0                          | 1             |
| China                                     | 300,400                    | 3,934         | Norway         | 0                          | 6             |
| Colombia                                  | 5,143                      | 108           | Pakistan       | 0                          | 193           |
| Costa Rica                                | 0                          | 1,243         | Peru           | 0                          | 874           |
| Croatia                                   | 0                          | 19            | Philippines    | 0                          | 98            |
| Czechia                                   | 0                          | 8             | Poland         | 0                          | 4,987         |
| Denmark                                   | 0                          | 51            | Portugal       | 0                          | 51            |
| Ecuador                                   | 0                          | 74            | Rep. of Korea  | 0                          | 3,258         |
| Egypt                                     | 0                          | 991           | Romania        | 0                          | 7             |
| El Salvador                               | 0                          | 11            | Russian        | 0                          | 4,496         |

|                        |        |        | Federation           |        |        |
|------------------------|--------|--------|----------------------|--------|--------|
| Estonia                | 0      | 119    | Rwanda               | 0      | 1      |
| Finland                | 0      | 11     | Saudi Arabia         | 0      | 787    |
| France                 | 0      | 190    | Serbia               | 0      | 77     |
| Germany                | 0      | 14,586 | Singapore            | 0      | 15,131 |
| Greece                 | 22,286 | 43     | Slovakia             | 0      | 34     |
| Guatemala              | 0      | 349    | Slovenia             | 0      | 128    |
| Hungary                | 0      | 305    | South Africa         | 0      | 361    |
| India                  | 857    | 11,066 | Spain                | 12,857 | 626    |
| Indonesia              | 0      | 17,769 | Sweden               | 0      | 51     |
| Ireland                | 0      | 6      | Switzerland          | 0      | 67     |
| Israel                 | 0      | 217    | Thailand             | 0      | 7,335  |
| Italy                  | 0      | 355    | Turkey               | 0      | 71     |
| Japan                  | 28,286 | 1,220  | United Arab Emirates | 0      | 58     |
| Jordan                 | 0      | 2      | United Kingdom       | 0      | 1,244  |
| Kazakhstan             | 0      | 19     | Uruguay              | 0      | 1      |
| Kenya                  | 0      | 2,901  | USA                  | 50,143 | 4,996  |
| Kuwait                 | 0      | 34     | Uzbekistan           | 0      | 9      |
| Lao People's Dem. Rep. | 0      | 66     | Viet Nam             | 0      | 2,037  |
| Latvia                 | 0      | 189    | Zimbabwe             | 0      | 6      |
| Lithuania              | 0      | 96     | Madagascar           | 0      | 1      |

The production data estimated based on the production statistics of EMD by country in 2017 by Li et al. and total production amount of EMD in 2019 which is extracted from GGII's report<sup>10, 11</sup>. The import data is extracted from UN Comtrade database<sup>3</sup>. HS code of relevant commodities is 282010. Estimation of manganese dioxide content in relevant commodity is assumed to be 100%.

**Table S11 Domestic production and import of lithium nickel cobalt manganese oxide & lithium nickel cobalt aluminium oxide (NCM & NCA) by country**

| NCM & NCA/ton |                     |        |
|---------------|---------------------|--------|
| Country       | Domestic production | Import |
| China         | 197,000             | 38,200 |

|                |        |        |
|----------------|--------|--------|
| Hungary        | 0      | 1,150  |
| Japan          | 56,481 | 2,491  |
| Poland         | 0      | 2,491  |
| Rep. of Korea  | 94,135 | 12,645 |
| United Kingdom | 0      | 771    |
| USA            | 0      | 9,483  |

The production data is extracted from China nonferrous metals industry association's report and China bulk commodity website<sup>2, 12</sup>. The import data is extracted from custom database of China, Japan and Korea<sup>13-15</sup>. HS code of relevant commodities is 2842903000. Estimation of NCM & NCA content in relevant commodity is adopted from our previous studies<sup>16</sup>.

**Table S12 Domestic production and import of lithium iron phosphate (LFP) by**

| <b>country</b> |                            |               |
|----------------|----------------------------|---------------|
|                | <b>LFP/ton</b>             |               |
| <b>Country</b> | <b>Domestic production</b> | <b>Import</b> |
| Canada         | 5,000                      | 29            |
| China          | 80,000                     | 552           |
| France         | 0                          | 45            |
| Rep. of Korea  | 0                          | 154           |
| USA            | 4,000                      | 3             |

The production data is extracted from China nonferrous metals industry association's report and China bulk commodity website<sup>2, 12</sup>. The import data is extracted from custom database of China, Japan and Korea<sup>13-15</sup>. HS code of relevant commodities is 2842904000. Estimation of LFP content in relevant commodity is adopted from our previous studies<sup>16</sup>.

**Table S13 Domestic production and import of lithium manganese oxide (LMO)**

**by country**

| <b>LMO/ton</b> |                            |               |
|----------------|----------------------------|---------------|
| <b>Country</b> | <b>Domestic production</b> | <b>Import</b> |
| China          | 76,400                     | 81            |
| Japan          | 10,629                     | 0             |
| Malaysia       | 0                          | 588           |
| Rep. of Korea  | 0                          | 18            |

The production data is extracted from China nonferrous metals industry association's report and China bulk commodity website<sup>2, 12</sup>. The import data is extracted from custom database of China, Japan and Korea<sup>13-15</sup>. HS code of relevant commodities is 2841691000. Estimation of LMO content in relevant commodity is adopted from our previous studies<sup>16</sup>.

**Table S14 Domestic production and import of lithium cobalt oxide (LCO) by**

**country**

| <b>LCO/ton</b> |                            |               |
|----------------|----------------------------|---------------|
| <b>Country</b> | <b>Domestic production</b> | <b>Import</b> |
| China          | 54,800                     | 8,491         |
| Japan          | 5,509                      | 1,740         |
| Rep. of Korea  | 23,413                     | 7,070         |
| USA            | 0                          | 1,059         |

The production data is extracted from China nonferrous metals industry association's report and China bulk commodity website<sup>2, 12</sup>. The import data is extracted from custom database of China, Japan and Korea<sup>13-15</sup>. HS code of relevant commodities is 2841900010. Estimation of cobalt content in relevant commodity is adopted from our previous studies<sup>16</sup>.

**Table S15 Domestic production and import of lithium-ion battery (LIB) by**

## country

The production data of China is extracted from China's National Bureau of Statistics<sup>17</sup>. The production data of Japan is extracted from National Bureau of Statistics<sup>18</sup>. The production of other countries was extracted from Global Information's report<sup>19</sup>. The import data in weight unit is extracted from UN Comtrade database<sup>3</sup>. HS code of relevant commodities is 850760. Estimation of LIB specific energy density is adopted from our previous studies<sup>16</sup>. Countries such as Russia, Vietnam and Malaysia also have LIB production facilities, of which total capacity are less 1000 MWh<sup>20</sup>. Owing to unreachable information and limited impact, the LIB production data of these countries are ignored.

| LIB/MWh            |                     |        |             |                     |        |
|--------------------|---------------------|--------|-------------|---------------------|--------|
| Country            | Domestic production | Import | Country     | Domestic production | Import |
| Argentina          | 0                   | 125    | Lithuania   | 0                   | 46     |
| Armenia            | 0                   | 5      | Luxembourg  | 0                   | 6      |
| Aruba              | 0                   | 1      | Madagascar  | 0                   | 5      |
| Australia          | 0                   | 1,043  | Malawi      | 0                   | 25     |
| Austria            | 0                   | 1,460  | Malaysia    | 0                   | 170    |
| Azerbaijan         | 0                   | 12     | Malta       | 0                   | 4      |
| Belarus            | 0                   | 50     | Mauritania  | 0                   | 1      |
| Belgium            | 0                   | 3,937  | Mauritius   | 0                   | 7      |
| Benin              | 0                   | 8      | Mexico      | 0                   | 1,242  |
| Bosnia Herzegovina | 0                   | 5      | Mongolia    | 0                   | 4      |
| Botswana           | 0                   | 18     | Morocco     | 0                   | 29     |
| Brazil             | 0                   | 790    | Myanmar     | 0                   | 27     |
| Brunei Darussalam  | 0                   | 1      | Namibia     | 0                   | 7      |
| Bulgaria           | 0                   | 153    | Netherlands | 0                   | 2,284  |
| Burkina Faso       | 0                   | 3      | New Zealand | 0                   | 89     |
| Burundi            | 0                   | 2      | Nicaragua   | 0                   | 20     |
| Cambodia           | 0                   | 21     | Nigeria     | 0                   | 181    |
| Canada             | 0                   | 670    | Norway      | 0                   | 525    |



|             |         |        |                      |        |       |
|-------------|---------|--------|----------------------|--------|-------|
| Chile       | 0       | 85     | Pakistan             | 0      | 55    |
| China       | 131,600 | 9,162  | Paraguay             | 0      | 12    |
| Colombia    | 0       | 67     | Peru                 | 0      | 115   |
| Congo       | 0       | 1      | Philippines          | 0      | 209   |
| Costa Rica  | 0       | 28     | Poland               | 6,000  | 3,752 |
| Croatia     | 0       | 28     | Portugal             | 0      | 102   |
| Cyprus      | 0       | 3      | Qatar                | 0      | 14    |
| Czechia     | 0       | 810    | Rep. of Korea        | 12,640 | 5,348 |
| Denmark     | 0       | 210    | Rep. of Moldova      | 0      | 5     |
| Ecuador     | 0       | 17     | Romania              | 0      | 400   |
| Egypt       | 0       | 119    | Russian Federation   | 0      | 432   |
| El Salvador | 0       | 12     | Rwanda               | 0      | 8     |
| Estonia     | 0       | 39     | Saint Lucia          | 0      | 1     |
| Fiji        | 0       | 6      | Saudi Arabia         | 0      | 256   |
| Finland     | 0       | 6      | Senegal              | 0      | 5     |
| France      | 0       | 2,649  | Serbia               | 0      | 15    |
| Georgia     | 0       | 2      | Seychelles           | 0      | 7     |
| Germany     | 0       | 13,077 | Singapore            | 0      | 472   |
| Ghana       | 0       | 65     | Slovakia             | 0      | 1,380 |
| Greece      | 0       | 71     | Slovenia             | 0      | 225   |
| Guatemala   | 0       | 45     | South Africa         | 0      | 226   |
| Guyana      | 0       | 2      | Spain                | 0      | 583   |
| Honduras    | 0       | 18     | State of Palestine   | 0      | 1     |
| Hungary     | 7,500   | 2,474  | Sweden               | 0      | 2,330 |
| Iceland     | 0       | 4      | Switzerland          | 0      | 410   |
| India       | 0       | 3,405  | Thailand             | 0      | 322   |
| Indonesia   | 0       | 1,086  | Togo                 | 0      | 7     |
| Ireland     | 0       | 77     | Tunisia              | 0      | 6     |
| Israel      | 0       | 84     | Turkey               | 0      | 553   |
| Italy       | 0       | 1,071  | United Arab Emirates | 0      | 601   |
| Jamaica     | 0       | 23     | United Kingdom       | 2,500  | 2,712 |
| Japan       | 12,860  | 3,553  | Uruguay              | 0      | 8     |
| Jordan      | 0       | 40     | USA                  | 15,000 | 9,689 |
| Kazakhstan  | 0       | 111    | Uzbekistan           | 0      | 11    |
| Kenya       | 0       | 67     | Viet Nam             | 0      | 4,367 |
| Kuwait      | 0       | 22     | Yemen                | 0      | 23    |
| Kyrgyzstan  | 0       | 4      | Zambia               | 0      | 15    |
| Latvia      | 0       | 15     | Zimbabwe             | 0      | 20    |

## 2. Model assumptions and data treatment

The data utilized in this study is mainly the production and trade data of 215 countries and regions. It should be noticed that national output is not the same as the output of a country's local firms. In the context of economic globalization, a considerable part of output is often contributed by foreign enterprises. Many developed countries tend to locate their production bases in less developed regions, such as China, due to their high human resource costs, stringent environmental regulations, etc. Here we take some representative companies in the lithium battery supply chain for example as following.

- **Umicore:** It is a Belgium's company, which is the largest supplier of cathode material. Its production plants of cathode material locate in the China (Jiangmen) and South Korea (Cheonan)<sup>21</sup>. There is mainly its research and development base in Europe.
- **Livent:** It is a subsidiary of American FMC, which is one of the largest suppliers of lithium basic chemicals. Its production plants locate in the USA and China<sup>22</sup>.
- **Panasonic:** It is a Japan's lithium battery manufacturer. Its production plants locate in the China (Dalian and Suzhou) and the USA<sup>23</sup>.
- **LG chem:** It is a Korea's lithium battery manufacturer. Its production plants locate in Korea, China, Poland (production begins in 2019), and the USA.

As mentioned in the methods section of the text, not all the commodities covered in this study are related to the lithium battery industry chain. Therefore, we propose vulnerability factor as an indicator to describe the degree of correlation. However, it is important to note that vulnerability indicators are developed based on global aggregate data. And the basic data for this study is at the national level. For the same kind of goods, the attributes of goods produced and traded in different countries are generally different. For example, although many countries also import a large amount of lithium carbonate, they import almost all industrial grade lithium carbonate, which is used in non-battery application fields of materials (see Table S16). Thus the value of the vulnerability factor should be much smaller for those countries' imports. However, the specific types of imported goods and the proportion of trade volume cannot be obtained. Therefore, this factor is not taken into account in our model.

**Table S16 Information about lithium carbonate buyers of India, Belgium, and Germany for the year of 2019**

| Country | Buyer                     | Weight/kg | Business scope      |
|---------|---------------------------|-----------|---------------------|
| Belgium | Acros Organics BVBA       | NA        | Non battery-related |
| Belgium | Belpol International SPRL | NA        | Non battery-related |
| Belgium | Chemacid SA               | NA        | Non battery-related |
| Belgium | Cobby's NV                | NA        | Non battery-related |
| Belgium | Dechimex SA               | NA        | Non battery-related |
| Belgium | Harco Group SA            | NA        | Non battery-related |
| Belgium | IMCD Benelux NV           | NA        | Non battery-related |
| Belgium | Kaneka Belgium NV         | NA        | Non battery-related |
| Belgium | Kaneka Belgium SA-NV      | NA        | Non battery-related |
| Belgium | Keyser & Mackay VBR       | NA        | Non battery-related |
| Belgium | Limaru NV                 | NA        | Non battery-related |
| Belgium | Mitsui & Co Benelux SA    | NA        | Non battery-related |
| Belgium | Norgine NV                | NA        | Non battery-related |

|         |                                                   |       |                     |
|---------|---------------------------------------------------|-------|---------------------|
| Belgium | Roam Technology NV                                | NA    | Non battery-related |
| Belgium | Societe De Financement Importation Et Exporta SA  | NA    | Non battery-related |
| Belgium | Solventis BVBA                                    | NA    | Non battery-related |
| Belgium | Specialty Metals Company SA                       | NA    | Non battery-related |
| Belgium | Stockmeier Chemicals Belux SA                     | NA    | Non battery-related |
| Belgium | Sumitomo Benelux SA                               | NA    | Non battery-related |
| Belgium | Toyota Tsusho Europe NV                           | NA    | Battery-related     |
| Belgium | Unifert Group SA                                  | NA    | Non battery-related |
| India   | MYLAN LABORATORIES LIMITED                        | 4,500 | Non battery-related |
| India   | ALEMBIC PHARMACEUTICALS LTD                       | 1,800 | Non battery-related |
| India   | J.B. CHEMICALS & PHARMACEUTICALS LIMITED          | 1,100 | Non battery-related |
| India   | J B CHEMICALS PHARMACEUTICALS LIMITED             | 1,000 | Non battery-related |
| India   | INTAS PHARMACEUTICALS LTD                         | 700   | Non battery-related |
| India   | ESAB INDIA LTD.                                   | 500   | Non battery-related |
| India   | INTAS PHARMACEUTICALS LTD.                        | 400   | Non battery-related |
| India   | EMCURE PHARMACEUTICALS LTD.                       | 300   | Non battery-related |
| India   | THERMO FISHER SCIENTIFIC INDIA PRIVATE LIMITED    | 50    | Non battery-related |
| India   | DOLPHIN CHEMICAL TRADERS INDIA PVT LTD            | 48    | Non battery-related |
| India   | CHROMACHEMIE LABORATORY PRIVATE LIMITED           | 16    | Non battery-related |
| India   | TATA INSTITUTE OF FUNDAMENTAL RESEARCH            | 10    | Non battery-related |
| India   | GMM PFAUDLER LIMITED                              | 7     | Non battery-related |
| India   | MERCK LIFE SCIENCE PVT LTD                        | 6     | Non battery-related |
| India   | MERCK LIFE SCIENCE PVT LTD                        | 6     | Non battery-related |
| India   | PACIFIC ORGANICS PVT LTD                          | 5     | Non battery-related |
| India   | LAURUS LABS LTD                                   | 5     | Non battery-related |
| India   | EMCURE PHARMACEUTICALS LTD                        | 2     | Non battery-related |
| India   | SIGMA ALDRICH CHEMICALS P LTD                     | 1     | Non battery-related |
| Germany | K.D. Feddersen Holding GmbH                       | NA    | Non battery-related |
| Germany | DINOX Handels GmbH                                | NA    | Non battery-related |
| Germany | Galvachem Chemiehandelsgesellschaft mbH           | NA    | Non battery-related |
| Germany | Mitsui & Co. Deutschland GmbH                     | NA    | Non battery-related |
| Germany | A. + E. Fischer-Chemie GmbH & Co.KG               | NA    | Non battery-related |
| Germany | Azelis Deutschland GmbH                           | NA    | Non battery-related |
| Germany | Behn Meyer Europe GmbH                            | NA    | Non battery-related |
| Germany | C.H. Erbslöh GmbH & Co. KG                        | NA    | Non battery-related |
| Germany | Carl Spaeter GmbH                                 | NA    | Non battery-related |
| Germany | FOX-CHEMICALS                                     | NA    | Non battery-related |
| Germany | GTS German Trading Service GmbH for Raw Materials | NA    | Non battery-related |

|         |                                                    |    |                     |
|---------|----------------------------------------------------|----|---------------------|
| Germany | HARKE Chemicals GmbH                               | NA | Non battery-related |
| Germany | Häffner International GmbH                         | NA | Non battery-related |
| Germany | Jebsen & Jessen (GmbH & Co.) KG                    | NA | Non battery-related |
| Germany | K.D. Feddersen Ueberseegesellschaft mbH            | NA | Non battery-related |
| Germany | KRAHN CHEMIE GMBH                                  | NA | Non battery-related |
| Germany | Klose Chemie Handelsgegesellschaft mbH             | NA | Non battery-related |
| Germany | Lehmann&Voss&Co. KG                                | NA | Non battery-related |
| Germany | Liebau Chemie Handelsgesellschaft mbH              | NA | Non battery-related |
| Germany | Mitsubishi International GmbH                      | NA | Non battery-related |
| Germany | NAGASE (EUROPA) GmbH                               | NA | Non battery-related |
| Germany | Ortex GmbH                                         | NA | Non battery-related |
| Germany | PICCADILLY Internationaler Handel GmbH             | NA | Non battery-related |
| Germany | Penta Chemikalien GmbH & Co. KG                    | NA | Non battery-related |
| Germany | REMY GmbH & Co. KG                                 | NA | Non battery-related |
| Germany | SHOWA DENKO EUROPE GmbH                            | NA | Non battery-related |
| Germany | Sumitomo Deutschland GmbH                          | NA | Non battery-related |
| Germany | TER HELL & CO. GMBH                                | NA | Non battery-related |
| Germany | Ulrich Friederich                                  | NA | Non battery-related |
| Germany | Vopelius Chemie AG                                 | NA | Non battery-related |
| Germany | WKI Kunststoffe GmbH Berlin                        | NA | Non battery-related |
| Germany | Willers Engel & Co. GmbH & Co.                     | NA | Non battery-related |
| Germany | Worlée-Chemie GmbH                                 | NA | Non battery-related |
| Germany | Zbigniew Bak Bak Handelsbetrieb                    | NA | Non battery-related |
| Germany | A&L Simonyan Company                               | NA | Non battery-related |
| Germany | ACTEGA DS GmbH                                     | NA | Non battery-related |
| Germany | AD STEIN                                           | NA | Non battery-related |
| Germany | AKO GmbH AKO The Spice Company!                    | NA | Non battery-related |
| Germany | Andenex - Chemie Engelhard + Partner GmbH          | NA | Non battery-related |
| Germany | Aqua-Concept Gesellschaft für Wasserbehandlung mbH | NA | Non battery-related |
| Germany | Astellas Pharma GmbH                               | NA | Non battery-related |
| Germany | Atriplex GmbH                                      | NA | Non battery-related |
| Germany | BCD Chemie GmbH Niederlassung Hildesheim           | NA | Non battery-related |
| Germany | CBC Europe GmbH                                    | NA | Non battery-related |
| Germany | CEBE Reinigungschemie GmbH                         | NA | Non battery-related |
| Germany | CJ Europe GmbH                                     | NA | Non battery-related |
| Germany | CareFusion Germany 234 GmbH                        | NA | Non battery-related |
| Germany | Carl Jäger Tonindustriebedarf GmbH                 | NA | Non battery-related |
| Germany | Christian Oswald Import - Export GmbH              | NA | Non battery-related |
| Germany | Colux GmbH                                         | NA | Non battery-related |
| Germany | DBH Osthandelsgesellschaft mbH                     | NA | Non battery-related |
| Germany | Denka Chemicals GmbH                               | NA | Non battery-related |
| Germany | Deutsche ICI GmbH                                  | NA | Non battery-related |

|         |                                              |    |                     |
|---------|----------------------------------------------|----|---------------------|
| Germany | EMRA-MED Arzneimittel GmbH                   | NA | Non battery-related |
| Germany | Europe-Asia Import Export GmbH               | NA | Non battery-related |
| Germany | F. Wilhelm Sengewald GmbH                    | NA | Non battery-related |
| Germany | Floragard Vertriebs GmbH für Gartenbau       | NA | Non battery-related |
| Germany | Frey + Lau GmbH                              | NA | Non battery-related |
| Germany | GE Healthcare Europe GmbH                    | NA | Non battery-related |
| Germany | Gustav C. Meht GmbH & Co. KG                 | NA | Non battery-related |
| Germany | Gustav Grolman GmbH & Co. KG                 | NA | Non battery-related |
| Germany | H.U. Scheulen GmbH & Co. KG                  | NA | Non battery-related |
| Germany | HANWHA EUROPE GmbH                           | NA | Non battery-related |
| Germany | HYUNDAI CORPORATION EUROPE GMBH              | NA | Non battery-related |
| Germany | Hans Seemann GmbH                            | NA | Non battery-related |
| Germany | Heinrich Brand GmbH & Co. KG                 | NA | Non battery-related |
| Germany | Herbert Kolloge KG                           | NA | Non battery-related |
| Germany | ITOCHU Deutschland GmbH                      | NA | Non battery-related |
| Germany | Intatrade Chemicals GmbH                     | NA | Non battery-related |
| Germany | Intra. Chem. Trading. GmbH                   | NA | Non battery-related |
| Germany | JFE Shoji Trade Corporation                  | NA | Non battery-related |
| Germany | JOTUN Deutschland GmbH                       | NA | Non battery-related |
| Germany | Julius Hoesch GmbH & Co. KG                  | NA | Non battery-related |
| Germany | KENT Deutschland GmbH                        | NA | Non battery-related |
| Germany | Kanematsu GmbH                               | NA | Non battery-related |
| Germany | LGC Standards GmbH                           | NA | Non battery-related |
| Germany | LUCIEN ORTSCHKEIT GmbH                       | NA | Non battery-related |
| Germany | MCC-Menssing Chemiehandel & Consultants GmbH | NA | Non battery-related |
| Germany | MEDICEM Siegfried R. Moser e.K.              | NA | Non battery-related |
| Germany | MTK-Pharma Vertriebs-GmbH                    | NA | Non battery-related |
| Germany | Medline International Germany GmbH           | NA | Non battery-related |
| Germany | Mitsubishi Chemical Europe GmbH              | NA | Non battery-related |
| Germany | Mitsui Chemicals Europe GmbH                 | NA | Non battery-related |
| Germany | N+P NIEBERGALL + PARTNER                     | NA | Non battery-related |
| Germany | Noweda eG Apothekergenossenschaft            | NA | Non battery-related |
| Germany | Oskar Berg GmbH                              | NA | Non battery-related |
| Germany | Otto Brandes GmbH                            | NA | Non battery-related |
| Germany | PHOENIX Pharma-Einkauf GmbH                  | NA | Non battery-related |
| Germany | PHOENIX Pharmahandel GmbH & Co KG            | NA | Non battery-related |
| Germany | PKV Pappenheimer Kunststoffmaschinenvertrieb | NA | Non battery-related |
| Germany | Rudolf Ostermann GmbH                        | NA | Non battery-related |
| Germany | Seitz + Kerler GmbH & Co. KG                 | NA | Non battery-related |
| Germany | Simon, Evers & Co GmbH                       | NA | Non battery-related |
| Germany | Sojitz Europe plc                            | NA | Non battery-related |
| Germany | TROPAG Oscar H. Ritter Nachf. GmbH           | NA | Non battery-related |
| Germany | Tennants GmbH                                | NA | Non battery-related |

|         |                                                          |    |                     |
|---------|----------------------------------------------------------|----|---------------------|
| Germany | The Graymor Chemical Hamburg GmbH                        | NA | Non battery-related |
| Germany | Univar GmbH                                              | NA | Non battery-related |
| Germany | VF Import-Export                                         | NA | Non battery-related |
| Germany | VINK CHEMICALS GmbH & Co.KG                              | NA | Non battery-related |
| Germany | Verschleißschutz und Gummitechnik GmbH                   | NA | Non battery-related |
| Germany | Vink + Co GmbH Handelsgesellschaft und Co.KG             | NA | Non battery-related |
| Germany | WEISSMEER BALTISCHE Import - Export GmbH                 | NA | Non battery-related |
| Germany | WELDING GMBH & CO. KG                                    | NA | Non battery-related |
| Germany | WTH Walter Thieme Handel GmbH                            | NA | Non battery-related |
| Germany | euronopa GmbH                                            | NA | Non battery-related |
| Germany | ilapo Internationale Ludwigs- Arzneimittel GmbH & Co. KG | NA | Non battery-related |
| Germany | kohlpharma GmbH                                          | NA | Non battery-related |

The data is adopted from the custom database Operated by Tradesns Science & Technology (DaLian) Co.,LTD<sup>24</sup>. It includes the international trade data on the enterprise level for over 80 countries (Some of the information has to be paid to be accessible). NA: Information is not available in the database.

### 3. Detail results

**Table S17 Competition index of various commodities**

| <b>Commodity</b> | <b>Competition index</b> |
|------------------|--------------------------|
| LH               | 438                      |
| LIB              | 401                      |
| LC               | 352                      |
| CO               | 203                      |
| NC               | 83                       |
| EMD              | 58                       |
| RC               | 55                       |
| NCM/NCA          | 43                       |
| NG               | 11                       |
| NO               | 7                        |
| LCO              | 5                        |
| MO               | 4                        |
| LMO              | 4                        |
| LFE              | 2                        |
| LM               | 1                        |

**Table S18 HHI values of various commodities**

| <b>Commodity</b> | <b>HHI</b> |
|------------------|------------|
| LM               | 3350       |
| CO               | 4901       |
| NO               | 1532       |
| MO               | 1536       |
| NG               | 4264       |
| LC               | 4173       |
| LH               | 5884       |
| RC               | 4149       |
| NC               | 5100       |
| EMD              | 5343       |
| NCM/NCA          | 4209       |
| LFP              | 8132       |
| LMO              | 7856       |
| LCO              | 5110       |
| LIB              | 5078       |

**Table S19 Top 10 trade partners with highest competition index**

| <b>Trade partners</b> |               | <b>Competition index</b> |
|-----------------------|---------------|--------------------------|
| Japan                 | Rep. of Korea | 219                      |
| China                 | Finland       | 61                       |
| Japan                 | France        | 49                       |
| Rep. of Korea         | USA           | 41                       |
| Belgium               | China         | 37                       |
| France                | Rep. of Korea | 36                       |
| Belgium               | Japan         | 36                       |
| China                 | Rep. of Korea | 35                       |
| China                 | Japan         | 34                       |
| Belgium               | Rep. of Korea | 28                       |

**Table S20 Regional competition index**

| <b>Country</b> | <b>LM</b> | <b>CO</b> | <b>NO</b> | <b>MO</b> | <b>NG</b> | <b>LC</b> | <b>LH</b> | <b>RC</b> | <b>NC</b> | <b>EMD</b> | <b>NCM<br/>/NCA</b> | <b>LFP</b> | <b>LMO</b> | <b>LCO</b> | <b>LIB</b> |
|----------------|-----------|-----------|-----------|-----------|-----------|-----------|-----------|-----------|-----------|------------|---------------------|------------|------------|------------|------------|
| Afghanistan    | 0         | 0         | 0         | 0         | 0         | 0         | 0         | 0         | 0         | 0          | 0                   | 0          | 0          | 0          | 0          |
| Albania        | 0         | 0         | 0         | 0         | 0         | 0         | 0         | 0         | 0         | 0          | 0                   | 0          | 0          | 0          | 0          |
| Algeria        | 0         | 0         | 0         | 0         | 0         | 0         | 0         | 0         | 0         | 0          | 0                   | 0          | 0          | 0          | 0          |



|                                   |   |    |   |   |   |    |    |   |    |    |   |   |   |   |    |
|-----------------------------------|---|----|---|---|---|----|----|---|----|----|---|---|---|---|----|
| American Samoa                    | 0 | 0  | 0 | 0 | 0 | 0  | 0  | 0 | 0  | 0  | 0 | 0 | 0 | 0 | 0  |
| Andorra                           | 0 | 0  | 0 | 0 | 0 | 0  | 0  | 0 | 0  | 0  | 0 | 0 | 0 | 0 | 0  |
| Angola                            | 0 | 0  | 0 | 0 | 0 | 0  | 0  | 0 | 0  | 0  | 0 | 0 | 0 | 0 | 0  |
| Anguilla                          | 0 | 0  | 0 | 0 | 0 | 0  | 0  | 0 | 0  | 0  | 0 | 0 | 0 | 0 | 0  |
| Antarctica                        | 0 | 0  | 0 | 0 | 0 | 0  | 0  | 0 | 0  | 0  | 0 | 0 | 0 | 0 | 0  |
| Antigua and Barbuda               | 0 | 0  | 0 | 0 | 0 | 0  | 0  | 0 | 0  | 0  | 0 | 0 | 0 | 0 | 0  |
| Argentina                         | 0 | 0  | 0 | 0 | 0 | 0  | 4  | 0 | 0  | 0  | 0 | 0 | 0 | 0 | 2  |
| Armenia                           | 0 | 0  | 0 | 0 | 0 | 0  | 0  | 0 | 0  | 0  | 0 | 0 | 0 | 0 | 0  |
| Aruba                             | 0 | 0  | 0 | 0 | 0 | 0  | 0  | 0 | 0  | 0  | 0 | 0 | 0 | 0 | 0  |
| Australia                         | 0 | 0  | 0 | 0 | 0 | 1  | 2  | 0 | 14 | 9  | 0 | 0 | 0 | 0 | 14 |
| Austria                           | 0 | 0  | 0 | 0 | 1 | 2  | 0  | 1 | 0  | 0  | 0 | 0 | 0 | 0 | 20 |
| Azerbaijan                        | 0 | 0  | 0 | 0 | 0 | 0  | 0  | 0 | 0  | 0  | 0 | 0 | 0 | 0 | 0  |
| Bahamas                           | 0 | 0  | 0 | 0 | 0 | 0  | 0  | 0 | 0  | 0  | 0 | 0 | 0 | 0 | 0  |
| Bahrain                           | 0 | 0  | 0 | 0 | 0 | 0  | 0  | 0 | 0  | 0  | 0 | 0 | 0 | 0 | 0  |
| Bangladesh                        | 0 | 0  | 0 | 0 | 0 | 0  | 0  | 0 | 0  | 0  | 0 | 0 | 0 | 0 | 0  |
| Barbados                          | 0 | 0  | 0 | 0 | 0 | 0  | 0  | 0 | 0  | 0  | 0 | 0 | 0 | 0 | 0  |
| Belarus                           | 0 | 0  | 0 | 0 | 0 | 0  | 0  | 0 | 0  | 0  | 0 | 0 | 0 | 0 | 1  |
| Belgium                           | 0 | 46 | 0 | 0 | 1 | 49 | 25 | 1 | 23 | 15 | 0 | 0 | 0 | 0 | 52 |
| Belize                            | 0 | 0  | 0 | 0 | 0 | 0  | 0  | 0 | 0  | 0  | 0 | 0 | 0 | 0 | 0  |
| Benin                             | 0 | 0  | 0 | 0 | 0 | 0  | 0  | 0 | 0  | 0  | 0 | 0 | 0 | 0 | 0  |
| Bermuda                           | 0 | 0  | 0 | 0 | 0 | 0  | 0  | 0 | 0  | 0  | 0 | 0 | 0 | 0 | 0  |
| Bhutan                            | 0 | 0  | 0 | 0 | 0 | 0  | 0  | 0 | 0  | 0  | 0 | 0 | 0 | 0 | 0  |
| Bolivia                           | 0 | 0  | 0 | 0 | 0 | 0  | 0  | 0 | 0  | 0  | 0 | 0 | 0 | 0 | 0  |
| Bonaire, Saint Eustatius and Saba | 0 | 0  | 0 | 0 | 0 | 0  | 0  | 0 | 0  | 0  | 0 | 0 | 0 | 0 | 0  |
| Bosnia and Herzegovina            | 0 | 0  | 0 | 0 | 0 | 0  | 0  | 0 | 0  | 0  | 0 | 0 | 0 | 0 | 0  |
| Botswana                          | 0 | 0  | 0 | 0 | 0 | 0  | 0  | 0 | 0  | 0  | 0 | 0 | 0 | 0 | 0  |
| Brazil                            | 0 | 0  | 0 | 0 | 0 | 0  | 0  | 3 | 2  | 2  | 0 | 0 | 0 | 0 | 11 |
| British Antarctic Territories     | 0 | 0  | 0 | 0 | 0 | 0  | 0  | 0 | 0  | 0  | 0 | 0 | 0 | 0 | 0  |
| British Indian Ocean Territories  | 0 | 0  | 0 | 0 | 0 | 0  | 0  | 0 | 0  | 0  | 0 | 0 | 0 | 0 | 0  |
| British Virgin Islands            | 0 | 0  | 0 | 0 | 0 | 0  | 0  | 0 | 0  | 0  | 0 | 0 | 0 | 0 | 0  |
| Brunei Darussalam                 | 0 | 0  | 0 | 0 | 0 | 0  | 0  | 0 | 0  | 0  | 0 | 0 | 0 | 0 | 0  |
| Bulgaria                          | 0 | 0  | 0 | 0 | 0 | 0  | 0  | 0 | 0  | 0  | 0 | 0 | 0 | 0 | 2  |
| Bunkers                           | 0 | 0  | 0 | 0 | 0 | 0  | 0  | 0 | 0  | 0  | 0 | 0 | 0 | 0 | 0  |
| Burkina Faso                      | 0 | 0  | 0 | 0 | 0 | 0  | 0  | 0 | 0  | 0  | 0 | 0 | 0 | 0 | 0  |
| Burundi                           | 0 | 0  | 0 | 0 | 0 | 0  | 0  | 0 | 0  | 0  | 0 | 0 | 0 | 0 | 0  |

|                                       |   |     |   |   |   |    |    |    |    |   |    |   |   |   |    |
|---------------------------------------|---|-----|---|---|---|----|----|----|----|---|----|---|---|---|----|
| Cabo Verde                            | 0 | 0   | 0 | 0 | 0 | 0  | 0  | 0  | 0  | 0 | 0  | 0 | 0 | 0 | 0  |
| Cambodia                              | 0 | 0   | 0 | 0 | 0 | 0  | 0  | 0  | 0  | 0 | 0  | 0 | 0 | 0 | 0  |
| Cameroon                              | 0 | 0   | 0 | 0 | 0 | 0  | 0  | 0  | 0  | 0 | 0  | 0 | 0 | 0 | 0  |
| Canada                                | 0 | 11  | 0 | 0 | 0 | 15 | 26 | 0  | 17 | 3 | 0  | 0 | 0 | 0 | 9  |
| Cayman Islands                        | 0 | 0   | 0 | 0 | 0 | 0  | 0  | 0  | 0  | 0 | 0  | 0 | 0 | 0 | 0  |
| Central African Republic              | 0 | 0   | 0 | 0 | 0 | 0  | 0  | 0  | 0  | 0 | 0  | 0 | 0 | 0 | 0  |
| Chad                                  | 0 | 0   | 0 | 0 | 0 | 0  | 0  | 0  | 0  | 0 | 0  | 0 | 0 | 0 | 0  |
| Chile                                 | 0 | 0   | 0 | 0 | 0 | 0  | 0  | 0  | 0  | 0 | 0  | 0 | 0 | 0 | 1  |
| China                                 | 1 | 172 | 7 | 3 | 3 | 34 | 0  | 34 | 0  | 0 | 25 | 0 | 0 | 3 | 8  |
| China, Hong Kong                      | 0 | 0   | 0 | 0 | 0 | 0  | 0  | 0  | 0  | 0 | 0  | 0 | 0 | 0 | 0  |
| China, Macao                          | 0 | 0   | 0 | 0 | 0 | 0  | 0  | 0  | 0  | 0 | 0  | 0 | 0 | 0 | 0  |
| Christmas Islands                     | 0 | 0   | 0 | 0 | 0 | 0  | 0  | 0  | 0  | 0 | 0  | 0 | 0 | 0 | 0  |
| Cocos Islands                         | 0 | 0   | 0 | 0 | 0 | 0  | 0  | 0  | 0  | 0 | 0  | 0 | 0 | 0 | 0  |
| Colombia                              | 0 | 0   | 0 | 0 | 0 | 0  | 0  | 0  | 0  | 0 | 0  | 0 | 0 | 0 | 1  |
| Comoros                               | 0 | 0   | 0 | 0 | 0 | 0  | 0  | 0  | 0  | 0 | 0  | 0 | 0 | 0 | 0  |
| Congo                                 | 0 | 0   | 0 | 0 | 0 | 0  | 0  | 0  | 0  | 0 | 0  | 0 | 0 | 0 | 0  |
| Cook Islands                          | 0 | 0   | 0 | 0 | 0 | 0  | 0  | 0  | 0  | 0 | 0  | 0 | 0 | 0 | 0  |
| Costa Rica                            | 0 | 0   | 0 | 0 | 0 | 0  | 0  | 0  | 0  | 1 | 0  | 0 | 0 | 0 | 0  |
| Côte d'Ivoire                         | 0 | 0   | 0 | 0 | 0 | 0  | 0  | 0  | 0  | 0 | 0  | 0 | 0 | 0 | 0  |
| Croatia                               | 0 | 0   | 0 | 0 | 0 | 0  | 0  | 0  | 0  | 0 | 0  | 0 | 0 | 0 | 0  |
| Cuba                                  | 0 | 0   | 0 | 0 | 0 | 0  | 0  | 0  | 0  | 0 | 0  | 0 | 0 | 0 | 0  |
| Curaçao                               | 0 | 0   | 0 | 0 | 0 | 0  | 0  | 0  | 0  | 0 | 0  | 0 | 0 | 0 | 0  |
| Cyprus                                | 0 | 0   | 0 | 0 | 0 | 0  | 0  | 0  | 0  | 0 | 0  | 0 | 0 | 0 | 0  |
| Czechia                               | 0 | 0   | 0 | 0 | 0 | 1  | 2  | 0  | 2  | 0 | 0  | 0 | 0 | 0 | 11 |
| Democratic People's Republic of Korea | 0 | 0   | 0 | 0 | 0 | 0  | 0  | 0  | 0  | 0 | 0  | 0 | 0 | 0 | 0  |
| Democratic Republic of the Congo      | 0 | 0   | 0 | 0 | 0 | 0  | 0  | 0  | 0  | 0 | 0  | 0 | 0 | 0 | 0  |
| Denmark                               | 0 | 0   | 0 | 0 | 0 | 1  | 0  | 0  | 0  | 0 | 0  | 0 | 0 | 0 | 3  |
| Djibouti                              | 0 | 0   | 0 | 0 | 0 | 0  | 0  | 0  | 0  | 0 | 0  | 0 | 0 | 0 | 0  |
| Dominica                              | 0 | 0   | 0 | 0 | 0 | 0  | 0  | 0  | 0  | 0 | 0  | 0 | 0 | 0 | 0  |
| Dominican Rep.                        | 0 | 0   | 0 | 0 | 0 | 0  | 0  | 0  | 0  | 0 | 0  | 0 | 0 | 0 | 0  |
| Ecuador                               | 0 | 0   | 0 | 0 | 0 | 0  | 0  | 0  | 0  | 0 | 0  | 0 | 0 | 0 | 0  |
| Egypt                                 | 0 | 0   | 0 | 0 | 0 | 0  | 2  | 0  | 0  | 1 | 0  | 0 | 0 | 0 | 2  |
| El Salvador                           | 0 | 0   | 0 | 0 | 0 | 0  | 0  | 0  | 0  | 0 | 0  | 0 | 0 | 0 | 0  |
| Equatorial Guinea                     | 0 | 0   | 0 | 0 | 0 | 0  | 0  | 0  | 0  | 0 | 0  | 0 | 0 | 0 | 0  |
| Eritrea                               | 0 | 0   | 0 | 0 | 0 | 0  | 0  | 0  | 0  | 0 | 0  | 0 | 0 | 0 | 0  |
| Estonia                               | 0 | 0   | 0 | 0 | 0 | 0  | 3  | 0  | 0  | 0 | 0  | 0 | 0 | 0 | 1  |

|                                          |   |    |   |   |   |    |    |   |   |    |   |   |   |   |     |
|------------------------------------------|---|----|---|---|---|----|----|---|---|----|---|---|---|---|-----|
| Ethiopia                                 | 0 | 0  | 0 | 0 | 0 | 0  | 0  | 0 | 0 | 0  | 0 | 0 | 0 | 0 | 0   |
| Faeroe Islands                           | 0 | 0  | 0 | 0 | 0 | 0  | 0  | 0 | 0 | 0  | 0 | 0 | 0 | 0 | 0   |
| Falkland Islands<br>(Malvinas)           | 0 | 0  | 0 | 0 | 0 | 0  | 0  | 0 | 0 | 0  | 0 | 0 | 0 | 0 | 0   |
| Federated State<br>of Micronesia         | 0 | 0  | 0 | 0 | 0 | 0  | 0  | 0 | 0 | 0  | 0 | 0 | 0 | 0 | 0   |
| Fiji                                     | 0 | 0  | 0 | 0 | 0 | 0  | 0  | 0 | 0 | 0  | 0 | 0 | 0 | 0 | 0   |
| Finland                                  | 0 | 79 | 0 | 0 | 0 | 0  | 0  | 0 | 0 | 0  | 0 | 0 | 0 | 0 | 0   |
| France                                   | 0 | 0  | 0 | 0 | 1 | 13 | 94 | 3 | 0 | 0  | 0 | 2 | 0 | 0 | 36  |
| Free Zones                               | 0 | 0  | 0 | 0 | 0 | 0  | 0  | 0 | 0 | 0  | 0 | 0 | 0 | 0 | 0   |
| French Polynesia                         | 0 | 0  | 0 | 0 | 0 | 0  | 0  | 0 | 0 | 0  | 0 | 0 | 0 | 0 | 0   |
| French South<br>Antarctic<br>Territories | 0 | 0  | 0 | 0 | 0 | 0  | 0  | 0 | 0 | 0  | 0 | 0 | 0 | 0 | 0   |
| Gabon                                    | 0 | 0  | 0 | 0 | 0 | 0  | 0  | 0 | 0 | 0  | 0 | 0 | 0 | 0 | 0   |
| Gambia                                   | 0 | 0  | 0 | 0 | 0 | 0  | 0  | 0 | 0 | 0  | 0 | 0 | 0 | 0 | 0   |
| Georgia                                  | 0 | 0  | 0 | 0 | 0 | 0  | 0  | 0 | 0 | 0  | 0 | 0 | 0 | 0 | 0   |
| Germany                                  | 0 | 0  | 0 | 0 | 3 | 17 | 0  | 4 | 7 | 12 | 0 | 0 | 0 | 0 | 143 |
| Ghana                                    | 0 | 0  | 0 | 0 | 0 | 0  | 12 | 0 | 0 | 0  | 0 | 0 | 0 | 0 | 1   |
| Gibraltar                                | 0 | 0  | 0 | 0 | 0 | 0  | 0  | 0 | 0 | 0  | 0 | 0 | 0 | 0 | 0   |
| Greece                                   | 0 | 0  | 0 | 0 | 0 | 0  | 0  | 0 | 0 | 0  | 0 | 0 | 0 | 0 | 1   |
| Greenland                                | 0 | 0  | 0 | 0 | 0 | 0  | 0  | 0 | 0 | 0  | 0 | 0 | 0 | 0 | 0   |
| Grenada                                  | 0 | 0  | 0 | 0 | 0 | 0  | 0  | 0 | 0 | 0  | 0 | 0 | 0 | 0 | 0   |
| Guam                                     | 0 | 0  | 0 | 0 | 0 | 0  | 0  | 0 | 0 | 0  | 0 | 0 | 0 | 0 | 0   |
| Guatemala                                | 0 | 0  | 0 | 0 | 0 | 0  | 0  | 0 | 0 | 0  | 0 | 0 | 0 | 0 | 1   |
| Guinea                                   | 0 | 0  | 0 | 0 | 0 | 0  | 0  | 0 | 0 | 0  | 0 | 0 | 0 | 0 | 0   |
| Guinea-Bissau                            | 0 | 0  | 0 | 0 | 0 | 0  | 0  | 0 | 0 | 0  | 0 | 0 | 0 | 0 | 0   |
| Guyana                                   | 0 | 0  | 0 | 0 | 0 | 0  | 0  | 0 | 0 | 0  | 0 | 0 | 0 | 0 | 0   |
| Haiti                                    | 0 | 0  | 0 | 0 | 0 | 0  | 0  | 0 | 0 | 0  | 0 | 0 | 0 | 0 | 0   |
| Heard Island and<br>McDonald<br>Islands  | 0 | 0  | 0 | 0 | 0 | 0  | 0  | 0 | 0 | 0  | 0 | 0 | 0 | 0 | 0   |
| Holy See<br>(Vatican City<br>State)      | 0 | 0  | 0 | 0 | 0 | 0  | 0  | 0 | 0 | 0  | 0 | 0 | 0 | 0 | 0   |
| Honduras                                 | 0 | 0  | 0 | 0 | 0 | 0  | 0  | 0 | 0 | 0  | 0 | 0 | 0 | 0 | 0   |
| Hungary                                  | 0 | 0  | 0 | 0 | 0 | 1  | 0  | 1 | 0 | 0  | 6 | 0 | 0 | 0 | 9   |
| Iceland                                  | 0 | 0  | 0 | 0 | 0 | 0  | 0  | 0 | 0 | 0  | 0 | 0 | 0 | 0 | 0   |
| Ile Bouvet                               | 0 | 0  | 0 | 0 | 0 | 0  | 0  | 0 | 0 | 0  | 0 | 0 | 0 | 0 | 0   |
| India                                    | 0 | 1  | 0 | 1 | 2 | 10 | 28 | 1 | 3 | 9  | 0 | 0 | 0 | 0 | 45  |
| Indonesia                                | 0 | 0  | 0 | 0 | 0 | 0  | 2  | 1 | 1 | 14 | 0 | 0 | 0 | 0 | 15  |
| Iran                                     | 0 | 0  | 0 | 0 | 0 | 0  | 0  | 0 | 0 | 0  | 0 | 0 | 0 | 0 | 0   |
| Iraq                                     | 0 | 0  | 0 | 0 | 0 | 0  | 0  | 0 | 0 | 0  | 0 | 0 | 0 | 0 | 0   |

|                           |   |    |   |   |   |     |     |    |    |   |   |   |   |   |    |
|---------------------------|---|----|---|---|---|-----|-----|----|----|---|---|---|---|---|----|
| Ireland                   | 0 | 0  | 0 | 0 | 0 | 0   | 0   | 1  | 0  | 0 | 0 | 0 | 0 | 0 | 1  |
| Israel                    | 0 | 0  | 0 | 0 | 0 | 0   | 0   | 0  | 0  | 0 | 0 | 0 | 0 | 0 | 1  |
| Italy                     | 0 | 0  | 0 | 0 | 0 | 4   | 4   | 1  | 4  | 0 | 0 | 0 | 0 | 0 | 15 |
| Jamaica                   | 0 | 0  | 0 | 0 | 0 | 0   | 0   | 0  | 0  | 0 | 0 | 0 | 0 | 0 | 0  |
| Japan                     | 0 | 29 | 4 | 1 | 3 | 142 | 304 | 1  | 50 | 0 | 1 | 0 | 0 | 1 | 11 |
| Jordan                    | 0 | 0  | 0 | 0 | 0 | 0   | 0   | 0  | 0  | 0 | 0 | 0 | 0 | 0 | 1  |
| Kazakhstan                | 0 | 0  | 0 | 0 | 0 | 0   | 0   | 0  | 0  | 0 | 0 | 0 | 0 | 0 | 2  |
| Kenya                     | 0 | 0  | 0 | 0 | 0 | 0   | 0   | 0  | 0  | 3 | 0 | 0 | 0 | 0 | 1  |
| Kiribati                  | 0 | 0  | 0 | 0 | 0 | 0   | 0   | 0  | 0  | 0 | 0 | 0 | 0 | 0 | 0  |
| Kuwait                    | 0 | 0  | 0 | 0 | 0 | 0   | 0   | 0  | 0  | 0 | 0 | 0 | 0 | 0 | 0  |
| Kyrgyzstan                | 0 | 0  | 0 | 0 | 0 | 0   | 0   | 0  | 0  | 0 | 0 | 0 | 0 | 0 | 0  |
| Lao People's<br>Dem. Rep. | 0 | 0  | 0 | 0 | 0 | 0   | 0   | 0  | 0  | 0 | 0 | 0 | 0 | 0 | 0  |
| Latvia                    | 0 | 0  | 0 | 0 | 0 | 0   | 0   | 0  | 0  | 0 | 0 | 0 | 0 | 0 | 0  |
| Lebanon                   | 0 | 0  | 0 | 0 | 0 | 0   | 0   | 0  | 0  | 0 | 0 | 0 | 0 | 0 | 0  |
| Lesotho                   | 0 | 0  | 0 | 0 | 0 | 0   | 0   | 0  | 0  | 0 | 0 | 0 | 0 | 0 | 0  |
| Liberia                   | 0 | 0  | 0 | 0 | 0 | 0   | 0   | 0  | 0  | 0 | 0 | 0 | 0 | 0 | 0  |
| Libya                     | 0 | 0  | 0 | 0 | 0 | 0   | 0   | 0  | 0  | 0 | 0 | 0 | 0 | 0 | 0  |
| Lithuania                 | 0 | 0  | 0 | 0 | 0 | 0   | 0   | 0  | 0  | 0 | 0 | 0 | 0 | 0 | 1  |
| Luxembourg                | 0 | 0  | 0 | 0 | 0 | 0   | 0   | 0  | 0  | 0 | 0 | 0 | 0 | 0 | 0  |
| Macedonia                 | 0 | 0  | 0 | 0 | 0 | 0   | 0   | 0  | 0  | 0 | 0 | 0 | 0 | 0 | 0  |
| Madagascar                | 0 | 0  | 0 | 0 | 0 | 0   | 0   | 0  | 0  | 0 | 0 | 0 | 0 | 0 | 0  |
| Malawi                    | 0 | 0  | 0 | 0 | 0 | 0   | 0   | 0  | 0  | 0 | 0 | 0 | 0 | 0 | 0  |
| Malaysia                  | 0 | 10 | 0 | 0 | 2 | 0   | 0   | 16 | 7  | 4 | 0 | 0 | 4 | 0 | 2  |
| Maldives                  | 0 | 0  | 0 | 0 | 0 | 0   | 0   | 0  | 0  | 0 | 0 | 0 | 0 | 0 | 0  |
| Mali                      | 0 | 0  | 0 | 0 | 0 | 0   | 0   | 0  | 0  | 0 | 0 | 0 | 0 | 0 | 0  |
| Malta                     | 0 | 0  | 0 | 0 | 0 | 0   | 0   | 0  | 0  | 0 | 0 | 0 | 0 | 0 | 0  |
| Marshall Islands          | 0 | 0  | 0 | 0 | 0 | 0   | 0   | 0  | 0  | 0 | 0 | 0 | 0 | 0 | 0  |
| Mauritania                | 0 | 0  | 0 | 0 | 0 | 0   | 0   | 0  | 0  | 0 | 0 | 0 | 0 | 0 | 0  |
| Mauritius                 | 0 | 0  | 0 | 0 | 0 | 0   | 0   | 0  | 0  | 0 | 0 | 0 | 0 | 0 | 0  |
| Mayotte                   | 0 | 0  | 0 | 0 | 0 | 0   | 0   | 0  | 0  | 0 | 0 | 0 | 0 | 0 | 0  |
| Mexico                    | 0 | 0  | 0 | 0 | 0 | 0   | 0   | 1  | 2  | 1 | 0 | 0 | 0 | 0 | 17 |
| Mongolia                  | 0 | 0  | 0 | 0 | 0 | 0   | 0   | 0  | 0  | 0 | 0 | 0 | 0 | 0 | 0  |
| Montenegro                | 0 | 0  | 0 | 0 | 0 | 0   | 0   | 0  | 0  | 0 | 0 | 0 | 0 | 0 | 0  |
| Montserrat                | 0 | 0  | 0 | 0 | 0 | 0   | 0   | 0  | 0  | 0 | 0 | 0 | 0 | 0 | 0  |
| Morocco                   | 0 | 3  | 0 | 0 | 0 | 0   | 0   | 0  | 0  | 0 | 0 | 0 | 0 | 0 | 0  |
| Mozambique                | 0 | 0  | 0 | 0 | 0 | 0   | 0   | 0  | 0  | 0 | 0 | 0 | 0 | 0 | 0  |
| Myanmar                   | 0 | 0  | 0 | 0 | 0 | 0   | 0   | 0  | 0  | 1 | 0 | 0 | 0 | 0 | 0  |
| Namibia                   | 0 | 0  | 0 | 0 | 0 | 0   | 0   | 0  | 0  | 4 | 0 | 0 | 0 | 0 | 0  |
| Nauru                     | 0 | 0  | 0 | 0 | 0 | 0   | 0   | 0  | 0  | 0 | 0 | 0 | 0 | 0 | 0  |
| Nepal                     | 0 | 0  | 0 | 0 | 0 | 0   | 0   | 0  | 0  | 0 | 0 | 0 | 0 | 0 | 0  |
| Netherlands               | 0 | 0  | 0 | 0 | 1 | 49  | 21  | 2  | 2  | 0 | 0 | 0 | 0 | 0 | 31 |
| Neutral Zone              | 0 | 0  | 0 | 0 | 0 | 0   | 0   | 0  | 0  | 0 | 0 | 0 | 0 | 0 | 0  |

|                                  |   |    |   |   |   |     |     |    |   |   |    |   |   |   |    |
|----------------------------------|---|----|---|---|---|-----|-----|----|---|---|----|---|---|---|----|
| New Caledonia                    | 0 | 0  | 0 | 0 | 0 | 0   | 0   | 0  | 0 | 0 | 0  | 0 | 0 | 0 | 0  |
| New Zealand                      | 0 | 0  | 0 | 0 | 0 | 0   | 0   | 0  | 0 | 0 | 0  | 0 | 0 | 0 | 1  |
| Nicaragua                        | 0 | 0  | 0 | 0 | 0 | 0   | 0   | 0  | 0 | 0 | 0  | 0 | 0 | 0 | 0  |
| Niger                            | 0 | 0  | 0 | 0 | 0 | 0   | 0   | 0  | 0 | 0 | 0  | 0 | 0 | 0 | 0  |
| Nigeria                          | 0 | 0  | 0 | 0 | 0 | 0   | 0   | 0  | 0 | 0 | 0  | 0 | 0 | 0 | 3  |
| Niue                             | 0 | 0  | 0 | 0 | 0 | 0   | 0   | 0  | 0 | 0 | 0  | 0 | 0 | 0 | 0  |
| Norfolk Islands                  | 0 | 0  | 0 | 0 | 0 | 0   | 0   | 0  | 0 | 0 | 0  | 0 | 0 | 0 | 0  |
| Northern<br>Mariana Islands      | 0 | 0  | 0 | 0 | 0 | 0   | 0   | 0  | 0 | 0 | 0  | 0 | 0 | 0 | 0  |
| Norway                           | 0 | 25 | 0 | 1 | 0 | 0   | 0   | 0  | 0 | 0 | 0  | 0 | 0 | 0 | 7  |
| Oman                             | 0 | 0  | 0 | 0 | 0 | 0   | 0   | 0  | 0 | 0 | 0  | 0 | 0 | 0 | 0  |
| Pakistan                         | 0 | 0  | 0 | 0 | 0 | 0   | 1   | 0  | 0 | 0 | 0  | 0 | 0 | 0 | 1  |
| Palau                            | 0 | 0  | 0 | 0 | 0 | 0   | 0   | 0  | 0 | 0 | 0  | 0 | 0 | 0 | 0  |
| Panama                           | 0 | 0  | 0 | 0 | 0 | 0   | 0   | 0  | 0 | 0 | 0  | 0 | 0 | 0 | 0  |
| Papua New Guinea                 | 0 | 0  | 0 | 0 | 0 | 0   | 0   | 0  | 0 | 0 | 0  | 0 | 0 | 0 | 0  |
| Paraguay                         | 0 | 0  | 0 | 0 | 0 | 0   | 0   | 0  | 0 | 0 | 0  | 0 | 0 | 0 | 0  |
| Peru                             | 0 | 0  | 0 | 0 | 0 | 0   | 1   | 0  | 0 | 1 | 0  | 0 | 0 | 0 | 2  |
| Philippines                      | 0 | 0  | 0 | 0 | 0 | 0   | 1   | 0  | 7 | 0 | 0  | 0 | 0 | 0 | 3  |
| Pitcairn                         | 0 | 0  | 0 | 0 | 0 | 0   | 0   | 0  | 0 | 0 | 0  | 0 | 0 | 0 | 0  |
| Poland                           | 0 | 0  | 0 | 0 | 1 | 1   | 3   | 0  | 1 | 4 | 13 | 0 | 0 | 0 | 20 |
| Portugal                         | 0 | 0  | 0 | 0 | 0 | 0   | 0   | 0  | 0 | 0 | 0  | 0 | 0 | 0 | 1  |
| Qatar                            | 0 | 0  | 0 | 0 | 0 | 0   | 0   | 0  | 0 | 0 | 0  | 0 | 0 | 0 | 0  |
| Rep. of Korea                    | 0 | 13 | 3 | 1 | 0 | 194 | 249 | 14 | 4 | 3 | 8  | 2 | 4 | 4 | 22 |
| Rep. of Moldova                  | 0 | 0  | 0 | 0 | 0 | 0   | 0   | 0  | 0 | 0 | 0  | 0 | 0 | 0 | 0  |
| Romania                          | 0 | 0  | 0 | 0 | 0 | 0   | 1   | 0  | 0 | 0 | 0  | 0 | 0 | 0 | 6  |
| Russian Federation               | 0 | 0  | 0 | 1 | 0 | 53  | 3   | 0  | 0 | 4 | 0  | 0 | 0 | 0 | 6  |
| Rwanda                           | 0 | 0  | 0 | 0 | 0 | 0   | 0   | 0  | 0 | 0 | 0  | 0 | 0 | 0 | 0  |
| Saint Barthélemy                 | 0 | 0  | 0 | 0 | 0 | 0   | 0   | 0  | 0 | 0 | 0  | 0 | 0 | 0 | 0  |
| Saint Helena                     | 0 | 0  | 0 | 0 | 0 | 0   | 0   | 0  | 0 | 0 | 0  | 0 | 0 | 0 | 0  |
| Saint Kitts and Nevis            | 0 | 0  | 0 | 0 | 0 | 0   | 0   | 0  | 0 | 0 | 0  | 0 | 0 | 0 | 0  |
| Saint Lucia                      | 0 | 0  | 0 | 0 | 0 | 0   | 0   | 0  | 0 | 0 | 0  | 0 | 0 | 0 | 0  |
| Saint Maarten (Dutch part)       | 0 | 0  | 0 | 0 | 0 | 0   | 0   | 0  | 0 | 0 | 0  | 0 | 0 | 0 | 0  |
| Saint Pierre and Miquelon        | 0 | 0  | 0 | 0 | 0 | 0   | 0   | 0  | 0 | 0 | 0  | 0 | 0 | 0 | 0  |
| Saint Vincent and the Grenadines | 0 | 0  | 0 | 0 | 0 | 0   | 0   | 0  | 0 | 0 | 0  | 0 | 0 | 0 | 0  |
| Samoa                            | 0 | 0  | 0 | 0 | 0 | 0   | 0   | 0  | 0 | 0 | 0  | 0 | 0 | 0 | 0  |
| San Marino                       | 0 | 0  | 0 | 0 | 0 | 0   | 0   | 0  | 0 | 0 | 0  | 0 | 0 | 0 | 0  |
| Sao Tome and Principe            | 0 | 0  | 0 | 0 | 0 | 0   | 0   | 0  | 0 | 0 | 0  | 0 | 0 | 0 | 0  |

|                                                    |   |    |   |   |   |    |    |   |   |    |   |   |   |   |   |    |
|----------------------------------------------------|---|----|---|---|---|----|----|---|---|----|---|---|---|---|---|----|
| Principe                                           |   |    |   |   |   |    |    |   |   |    |   |   |   |   |   |    |
| Saudi Arabia                                       | 0 | 0  | 0 | 0 | 0 | 0  | 3  | 0 | 0 | 1  | 0 | 0 | 0 | 0 | 0 | 4  |
| Senegal                                            | 0 | 0  | 0 | 0 | 0 | 0  | 0  | 0 | 0 | 0  | 0 | 0 | 0 | 0 | 0 | 0  |
| Serbia                                             | 0 | 0  | 0 | 0 | 0 | 0  | 0  | 0 | 0 | 0  | 0 | 0 | 0 | 0 | 0 | 0  |
| Seychelles                                         | 0 | 0  | 0 | 0 | 0 | 0  | 0  | 0 | 0 | 0  | 0 | 0 | 0 | 0 | 0 | 0  |
| Sierra Leone                                       | 0 | 0  | 0 | 0 | 0 | 0  | 0  | 0 | 0 | 0  | 0 | 0 | 0 | 0 | 0 | 0  |
| Singapore                                          | 0 | 0  | 0 | 0 | 0 | 0  | 5  | 3 | 3 | 12 | 0 | 0 | 0 | 0 | 0 | 7  |
| Slovakia                                           | 0 | 0  | 0 | 0 | 0 | 0  | 0  | 0 | 0 | 0  | 0 | 0 | 0 | 0 | 0 | 19 |
| Slovenia                                           | 0 | 0  | 0 | 0 | 0 | 0  | 4  | 0 | 1 | 0  | 0 | 0 | 0 | 0 | 0 | 3  |
| Solomon Islands                                    | 0 | 0  | 0 | 0 | 0 | 0  | 0  | 0 | 0 | 0  | 0 | 0 | 0 | 0 | 0 | 0  |
| Somalia                                            | 0 | 0  | 0 | 0 | 0 | 0  | 0  | 0 | 0 | 0  | 0 | 0 | 0 | 0 | 0 | 0  |
| South Africa                                       | 0 | 0  | 0 | 0 | 0 | 1  | 6  | 0 | 0 | 0  | 0 | 0 | 0 | 0 | 0 | 3  |
| South Georgia<br>and the South<br>Sandwich Islands | 0 | 0  | 0 | 0 | 0 | 0  | 0  | 0 | 0 | 0  | 0 | 0 | 0 | 0 | 0 | 0  |
| South Sudan                                        | 0 | 0  | 0 | 0 | 0 | 0  | 0  | 0 | 0 | 0  | 0 | 0 | 0 | 0 | 0 | 0  |
| Spain                                              | 0 | 11 | 0 | 0 | 0 | 10 | 35 | 2 | 1 | 0  | 0 | 0 | 0 | 0 | 0 | 8  |
| Special<br>Categories                              | 0 | 0  | 0 | 0 | 0 | 0  | 0  | 0 | 0 | 0  | 0 | 0 | 0 | 0 | 0 | 0  |
| Sri Lanka                                          | 0 | 0  | 0 | 0 | 0 | 0  | 0  | 0 | 0 | 0  | 0 | 0 | 0 | 0 | 0 | 0  |
| State of Palestine                                 | 0 | 0  | 0 | 0 | 0 | 0  | 0  | 0 | 0 | 0  | 0 | 0 | 0 | 0 | 0 | 0  |
| Sudan                                              | 0 | 0  | 0 | 0 | 0 | 0  | 0  | 0 | 0 | 0  | 0 | 0 | 0 | 0 | 0 | 0  |
| Suriname                                           | 0 | 0  | 0 | 0 | 0 | 0  | 0  | 0 | 0 | 0  | 0 | 0 | 0 | 0 | 0 | 0  |
| Swaziland                                          | 0 | 0  | 0 | 0 | 0 | 0  | 0  | 0 | 0 | 0  | 0 | 0 | 0 | 0 | 0 | 0  |
| Sweden                                             | 0 | 0  | 0 | 0 | 0 | 1  | 3  | 0 | 0 | 0  | 0 | 0 | 0 | 0 | 0 | 32 |
| Switzerland                                        | 0 | 0  | 0 | 0 | 0 | 1  | 1  | 0 | 1 | 0  | 0 | 0 | 0 | 0 | 0 | 6  |
| Syria                                              | 0 | 0  | 0 | 0 | 0 | 0  | 0  | 0 | 0 | 0  | 0 | 0 | 0 | 0 | 0 | 0  |
| Tajikistan                                         | 0 | 0  | 0 | 0 | 0 | 0  | 0  | 0 | 0 | 0  | 0 | 0 | 0 | 0 | 0 | 0  |
| Thailand                                           | 0 | 0  | 0 | 0 | 0 | 1  | 4  | 0 | 3 | 6  | 0 | 0 | 0 | 0 | 0 | 5  |
| Timor-Leste                                        | 0 | 0  | 0 | 0 | 0 | 0  | 0  | 0 | 0 | 0  | 0 | 0 | 0 | 0 | 0 | 0  |
| Togo                                               | 0 | 0  | 0 | 0 | 0 | 0  | 0  | 0 | 0 | 0  | 0 | 0 | 0 | 0 | 0 | 0  |
| Tokelau                                            | 0 | 0  | 0 | 0 | 0 | 0  | 0  | 0 | 0 | 0  | 0 | 0 | 0 | 0 | 0 | 0  |
| Tonga                                              | 0 | 0  | 0 | 0 | 0 | 0  | 0  | 0 | 0 | 0  | 0 | 0 | 0 | 0 | 0 | 0  |
| Trinidad and<br>Tobago                             | 0 | 0  | 0 | 0 | 0 | 0  | 0  | 0 | 0 | 0  | 0 | 0 | 0 | 0 | 0 | 0  |
| Tunisia                                            | 0 | 0  | 0 | 0 | 0 | 0  | 0  | 0 | 0 | 0  | 0 | 0 | 0 | 0 | 0 | 0  |
| Turkey                                             | 0 | 0  | 0 | 0 | 1 | 0  | 4  | 1 | 1 | 0  | 0 | 0 | 0 | 0 | 0 | 8  |
| Turkmenistan                                       | 0 | 0  | 0 | 0 | 0 | 0  | 0  | 0 | 0 | 0  | 0 | 0 | 0 | 0 | 0 | 0  |
| Turks and Caicos<br>Islands                        | 0 | 0  | 0 | 0 | 0 | 0  | 0  | 0 | 0 | 0  | 0 | 0 | 0 | 0 | 0 | 0  |
| Tuvalu                                             | 0 | 0  | 0 | 0 | 0 | 0  | 0  | 0 | 0 | 0  | 0 | 0 | 0 | 0 | 0 | 0  |
| Uganda                                             | 0 | 0  | 0 | 0 | 0 | 0  | 0  | 0 | 0 | 0  | 0 | 0 | 0 | 0 | 0 | 0  |
| Ukraine                                            | 0 | 0  | 0 | 0 | 0 | 0  | 0  | 0 | 0 | 0  | 0 | 0 | 0 | 0 | 0 | 0  |

|                           |   |   |   |   |   |    |   |    |   |   |    |   |   |   |    |    |
|---------------------------|---|---|---|---|---|----|---|----|---|---|----|---|---|---|----|----|
| United Arab Emirates      | 0 | 0 | 0 | 0 | 0 | 0  | 0 | 8  | 0 | 0 | 0  | 0 | 0 | 0 | 0  | 8  |
| United Kingdom            | 0 | 1 | 0 | 0 | 0 | 12 | 8 | 4  | 2 | 1 | 4  | 0 | 0 | 0 | 0  | 19 |
| United Rep. of Tanzania   | 0 | 0 | 0 | 0 | 0 | 0  | 0 | 0  | 0 | 0 | 0  | 0 | 0 | 0 | 0  | 0  |
| Uruguay                   | 0 | 0 | 0 | 0 | 0 | 0  | 0 | 0  | 0 | 0 | 0  | 0 | 0 | 0 | 0  | 0  |
| USA                       | 1 | 0 | 0 | 0 | 3 | 86 | 2 | 12 | 2 | 0 | 30 | 0 | 0 | 3 | 29 |    |
| Uzbekistan                | 0 | 0 | 0 | 0 | 0 | 0  | 0 | 0  | 0 | 0 | 0  | 0 | 0 | 0 | 0  | 0  |
| Vanuatu                   | 0 | 0 | 0 | 0 | 0 | 0  | 0 | 0  | 0 | 0 | 0  | 0 | 0 | 0 | 0  | 0  |
| Venezuela                 | 0 | 0 | 0 | 0 | 0 | 0  | 0 | 0  | 0 | 0 | 0  | 0 | 0 | 0 | 0  | 0  |
| Viet Nam                  | 0 | 1 | 0 | 0 | 0 | 2  | 0 | 0  | 3 | 2 | 0  | 0 | 0 | 0 | 0  | 57 |
| Wallis and Futuna Islands | 0 | 0 | 0 | 0 | 0 | 0  | 0 | 0  | 0 | 0 | 0  | 0 | 0 | 0 | 0  | 0  |
| Western Sahara            | 0 | 0 | 0 | 0 | 0 | 0  | 0 | 0  | 0 | 0 | 0  | 0 | 0 | 0 | 0  | 0  |
| Yemen                     | 0 | 0 | 0 | 0 | 0 | 0  | 0 | 0  | 0 | 0 | 0  | 0 | 0 | 0 | 0  | 0  |
| Yugoslavia                | 0 | 0 | 0 | 0 | 0 | 0  | 0 | 0  | 0 | 0 | 0  | 0 | 0 | 0 | 0  | 0  |
| Yugoslavia                | 0 | 0 | 0 | 0 | 0 | 0  | 0 | 0  | 0 | 0 | 0  | 0 | 0 | 0 | 0  | 0  |
| Zambia                    | 0 | 4 | 0 | 0 | 0 | 0  | 0 | 1  | 0 | 0 | 0  | 0 | 0 | 0 | 0  | 0  |
| Zimbabwe                  | 0 | 0 | 0 | 0 | 0 | 0  | 0 | 0  | 0 | 0 | 0  | 0 | 0 | 0 | 0  | 0  |

**Table S21 Global supply chain of LIB produced by Tesla’s Gigafactory 1 in Nevada**

| LIB/GWh                            |               |        | NCA/ton                           |               |        | LH/ton                            |               |        |
|------------------------------------|---------------|--------|-----------------------------------|---------------|--------|-----------------------------------|---------------|--------|
| Destination                        | Supply source | Volume | Destination                       | Supply source | Volume | Destination                       | Supply source | Volume |
| USA                                | USA           | 70     | USA                               | Japan         | 97,300 | Japan                             | Chile         | 737    |
|                                    |               |        |                                   |               |        | Japan                             | China         | 19,200 |
|                                    |               |        |                                   |               |        | Japan                             | USA           | 4,451  |
| LM/ton lithium metallic equivalent |               |        | RC/ton cobalt metallic equivalent |               |        | CO/ton cobalt metallic equivalent |               |        |
| Destination                        | Supply source | Volume | Destination                       | Supply source | Volume | Destination                       | Supply source | Volume |
| <b>Chile</b>                       | Chile         | 214    | Japan                             | Japan         | 7,488  | Japan                             | DRC           | 7,488  |
| <b>China</b>                       | China         | 1,022  | Japan                             | Australia     | 25     | Australia                         | Australia     | 25     |
| <b>China</b>                       | Australia     | 4,544  | Japan                             | Belgium       | 38     | Belgium                           | DRC           | 38     |
| <b>USA</b>                         | Chile         | 1,290  | Japan                             | Canada        | 215    | Canada                            | Canada        | 215    |
|                                    |               |        | Japan                             | China         | 98     | China                             | China         | 3      |
|                                    |               |        | Japan                             | Finland       | 769    | China                             | DRC           | 95     |
|                                    |               |        | Japan                             | France        | 4      | Finland                           | Finland       | 26     |
|                                    |               |        | Japan                             | Madagascar    | 58     | Finland                           | DRC           | 742    |
|                                    |               |        | Japan                             | Morocco       | 55     | France                            | France        | 4      |

|                                           |                      |               |                                           |                      |               |              |              |    |
|-------------------------------------------|----------------------|---------------|-------------------------------------------|----------------------|---------------|--------------|--------------|----|
|                                           |                      |               | Japan                                     | Norway               | 59            | Madagascar   | Madagascar   | 58 |
|                                           |                      |               | Japan                                     | Russia               | 24            | Morocco      | Morocco      | 55 |
|                                           |                      |               | Japan                                     | South Africa         | 7             | Norway       | DRC          | 59 |
|                                           |                      |               | Japan                                     | Zambia               | 99            | Russia       | Russia       | 24 |
|                                           |                      |               |                                           |                      |               | South Africa | South Africa | 7  |
|                                           |                      |               |                                           |                      |               | Africa       |              |    |
|                                           |                      |               |                                           |                      |               | Zambia       | Zambia       | 50 |
|                                           |                      |               |                                           |                      |               | Zambia       | DRC          | 50 |
| <b>NC/ ton nickel metallic equivalent</b> |                      |               | <b>NO/ ton nickel metallic equivalent</b> |                      |               |              |              |    |
| <b>Destination</b>                        | <b>Supply source</b> | <b>Volume</b> | <b>Destination</b>                        | <b>Supply source</b> | <b>Volume</b> |              |              |    |
| <b>Japan</b>                              | Japan                | 53,779        | Japan                                     | Indonesia            | 711           |              |              |    |
| <b>Japan</b>                              | Finland              | 9,800         | Japan                                     | New Caledonia        | 29,221        |              |              |    |
| <b>Japan</b>                              | Korea                | 12,513        | Japan                                     | Philippines          | 23,847        |              |              |    |
| <b>Japan</b>                              | China (Taiwan)       | 49,553        | Finland                                   | Finland              | 9,800         |              |              |    |
|                                           |                      |               | China                                     | China                | 6,183         |              |              |    |
|                                           |                      |               | Rep. of Korea                             | Australia            | 0             |              |              |    |
|                                           |                      |               | Rep. of Korea                             | China                | 1             |              |              |    |
|                                           |                      |               | Rep. of Korea                             | Netherlands          | 0             |              |              |    |
|                                           |                      |               | Rep. of Korea                             | New Caledonia        | 43,369        |              |              |    |
|                                           |                      |               | Rep. of Korea                             | Papua New Guinea     | 0             |              |              |    |
|                                           |                      |               | Rep. of Korea                             | South Africa         | 1             |              |              |    |
|                                           |                      |               | Rep. of Korea                             | Turkey               | 0             |              |              |    |
|                                           |                      |               | Rep. of Korea                             | USA                  | 0             |              |              |    |

This global supply chain is artificially assumed based on the 2019 supply network of Tesla, which is not completely consistent with the actual situation. In 2019, the LIB used by Tesla' electric vehicle mainly comes from Panasonic<sup>25</sup>. We assume that the batteries produced in Gigafactory 1 are all supported by Panasonic. Referring to Panasonic's product technical manual, the cathode material of their batteries is NCA. The mass of cathode materials required for per kWh NCA battery is 1.39 kg<sup>26</sup>. Thus, the cathode materials required for the 70 GWh battery is 97000 ton NCA. Further, the



raw materials needed for these cathode materials are: 24388 ton LH, 8938 ton RC (cobalt content), 125645 ton nickel sulfate, 7070 ton LM (lithium content), 8938 ton CO (cobalt content), and 47670 ton NO (nickel content). Japan Sumitomo Metal Industries is the only cathode materials supplier of Panasonic<sup>25</sup>. Thus we assume all the cathode materials come from Japan. Information about supply relationships of other raw materials is not available. Here we use the 2019 global international trade network of each type of commodity to allocate the supply of needed commodities.

#### 4. Uncertainty analysis

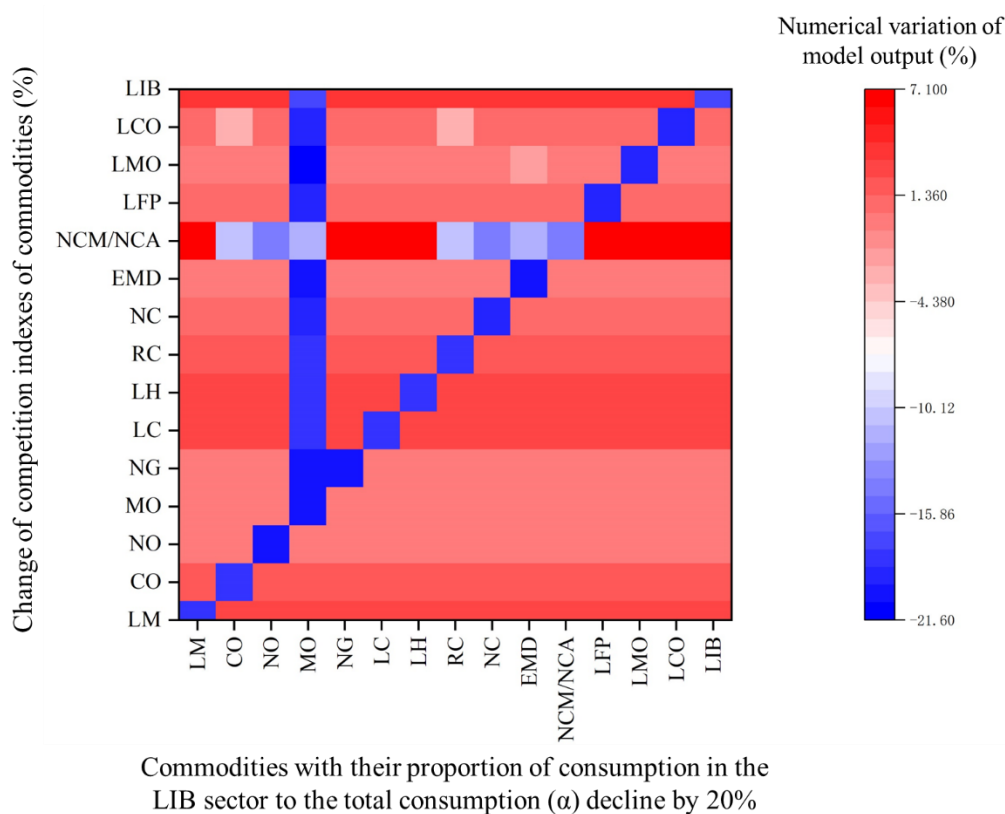

**Figure S1 Uncertainty analysis of proportion of consumption in the LIB sector to the total consumption ( $\alpha$ )**

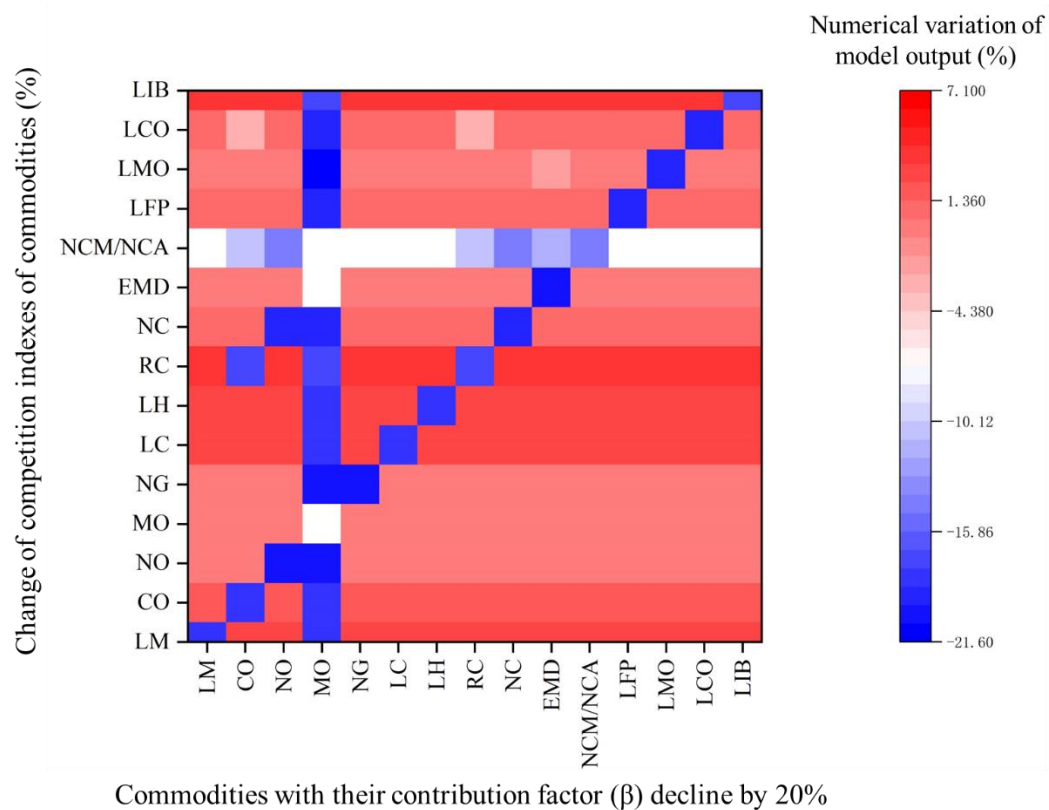

**Figure S2 Uncertainty analysis of contribution factor ( $\beta$ )**

Figure S1 and S2 show the change of the competition index of each commodity as the  $\alpha$  and  $\beta$  value of each commodity drops by 20%. The color of the mesh corresponds to the percentage change. The mapping between colors and changes is shown in the legend on the right in the figure.

## References

1. USGS *Mineral commodity summaries 2020*; United States Geological Survey: <https://minerals.usgs.gov/minerals/pubs/>, 2020.
2. CNMIA *China major lithium products statistics in 2019*; China Nonferrous Metals Industry Association <http://www.chinali.org/>, 2020.
3. UN Comtrade *Trade data*; United Nations Comtrade <https://comtrade.un.org/data/>, 2020.
4. Sun, X.; Hao, H.; Liu, Z.; Zhao, F.; Song, J., Tracing global cobalt flow: 1995–2015. *Resources, Conservation and Recycling* **2019**, *149*, 45-55.
5. Nakajima, K.; Daigo, I.; Nansai, K.; Matsubae, K.; Takayanagi, W.; Tomita, M.; Matsuno, Y., Global distribution of material consumption: Nickel, copper, and iron. *Resources, Conservation and Recycling* **2018**, *133*, 369-374.
6. Sun, X.; Hao, H.; Liu, Z.; Zhao, F., Insights into the global flow pattern of manganese. *Resources Policy* **2020**, *65*, 101578.
7. Rui, X.; Geng, Y.; Sun, X.; Hao, H.; Xiao, S., Dynamic material flow analysis of natural graphite in China for 2001-2018. *Resources, Conservation and Recycling* **2021**, *173*.
8. Cobalt Institute *Cobalt Production Statistics*; <https://www.cobaltinstitute.org/statistics.html>, 2020.
9. CBC *World refined nickel production in 2019*; China Bulk Commodity: <http://www.cbcie.com/data/754376.html>, 2020.
10. Li, T.; Li, H.; Zhang, L., Review and prospect of electrolytic manganese dioxide market in 2017. *China's Manganese Industry* **2018**, *36*, (3), 1-4.
11. GGII *Global production of electrolytic manganese dioxides*; Gao Gong Industrial

Research Consulting Co., Ltd: 2020.

12. CBC *Review and prospect of cathode material market in China and abroad in 2019*;

China Bulk Commodity: <http://www.cbcie.com/news/694341.html>, 2020.

13. CCIN *Import and Export Data*; China Customs Information Network:

<http://www.haiguan.info/>, 2020.

14. KCS *Trade Statistics*; Korea Customs Service <http://www.customs.go.kr/kcshome/trade>,

2020.

15. Trade Statistics of Japan *General Trade Statistics*; Japan Ministry of Finance:

<http://www.customs.go.jp/toukei/srch/indexe.htm>, 2020.

16. Sun, X.; Hao, H.; Zhao, F.; Liu, Z., Global Lithium Flow 1994-2015: Implications for Improving Resource Efficiency and Security. *Environ Sci Technol* **2018**, 52, (5), 2827-2834.

17. NBSC *China statistics yearbook 2019*; National Bureau of Statistics of China:

<http://data.stats.gov.cn/easyquery.htm?cn=C01>, 2020.

18. SBJ *Japan Statistical Yearbook 2019*; Statistics Bureau of Japan:

<http://www.stat.go.jp/english/data>, 2020.

19. Global Information *Global and China Li-ion Power Battery Industry Report, 2018-2022*;

<https://www.giiresearch.com/report/rinc314945-global-china-li-ion-power-battery-industry-report.html>, 2018.

20. Simon, B. *Commentary: Who wants to be in charge?*; International Energy Agency:

<https://www.iea.org/newsroom/news/2017/november/commentary-battery-production---who-wants-to-be-in-charge.html>, 2017.

21. Umicore *Increasing the gap in Rechargeable Battery Materials*;

- <https://www.umicore.com/en/investors/presentations/>, 2018.
22. Livent *Global locations*; <https://livent.com/company-overview/global-locations/#>, 2020.
23. Panasonic *Anal report 2019*; <https://www.panasonic.com/global/corporate/ir/annual.html>, 2020.
24. TradeSNS *Customs data enquiry*; Trade social networking service: <https://www.tradesns.com/en>, 2021.
25. China battery alliance *Tesla's raw matwerial supplier list*; <http://chuneng.bjx.com.cn/news/20170822/844802.shtml>, 2017.
26. Zeng, X.; Li, M.; Abd El□Hady, D.; Alshitari, W.; Al□Bogami, A. S.; Lu, J.; Amine, K., Commercialization of Lithium Battery Technologies for Electric Vehicles. *Advanced Energy Materials* **2019**, 9, (27), 1900161.
